# Supplementary material for: Epigenetic memory in induced pluripotent stem cells
Source: Springer Nature journal article supplement (doi:10.1038/nature09342), 2010-07-19
Supplement: 41586_2010_BFnature09342_MOESM441_ESM.pdf [file 41586_2010_BFnature09342_MOESM441_ESM.pdf]

## SUPPLEMENTARY INFORMATION

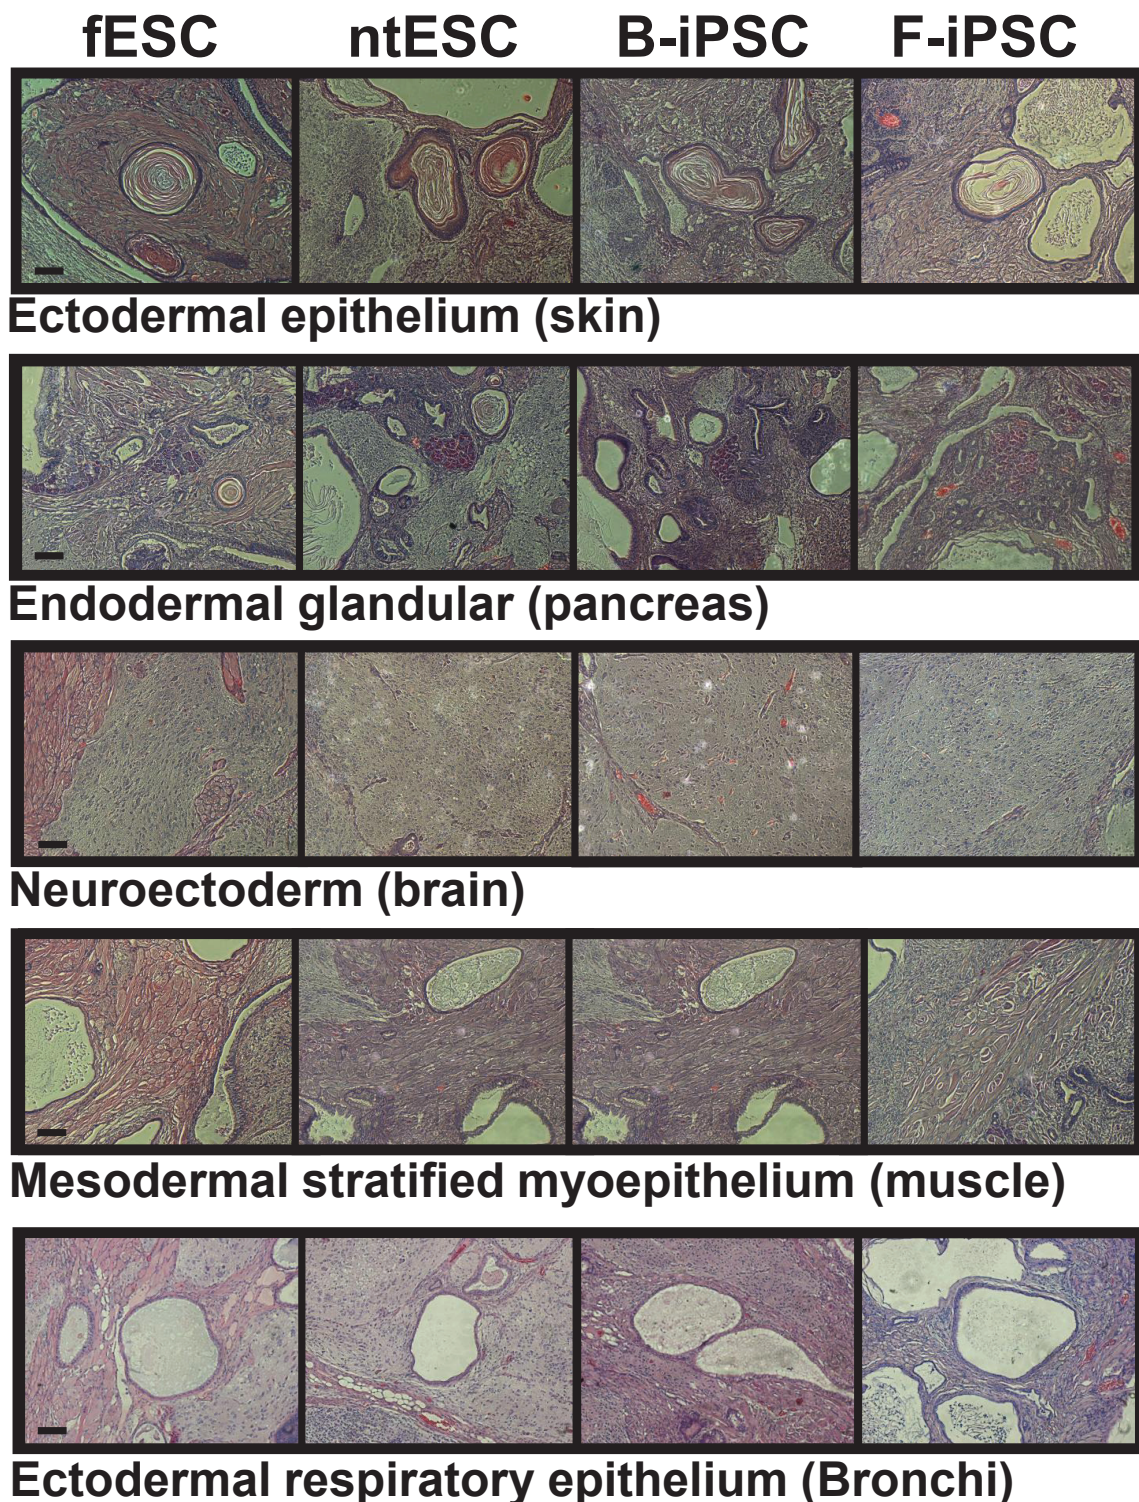

**Supplementary Figure 1 | Teratoma analysis of the fESC, ntESC, B-iPSC, and F-iPSC.** Ectodermal epithelium (skin), Endodermal glandular (pancreas), Neuroectoderm (brain), Mesodermal stratified myoepithelium (muscle), and Ectodermal respiratory epithelium (Bronchi). Scale bar, 500 $\mu$ m.

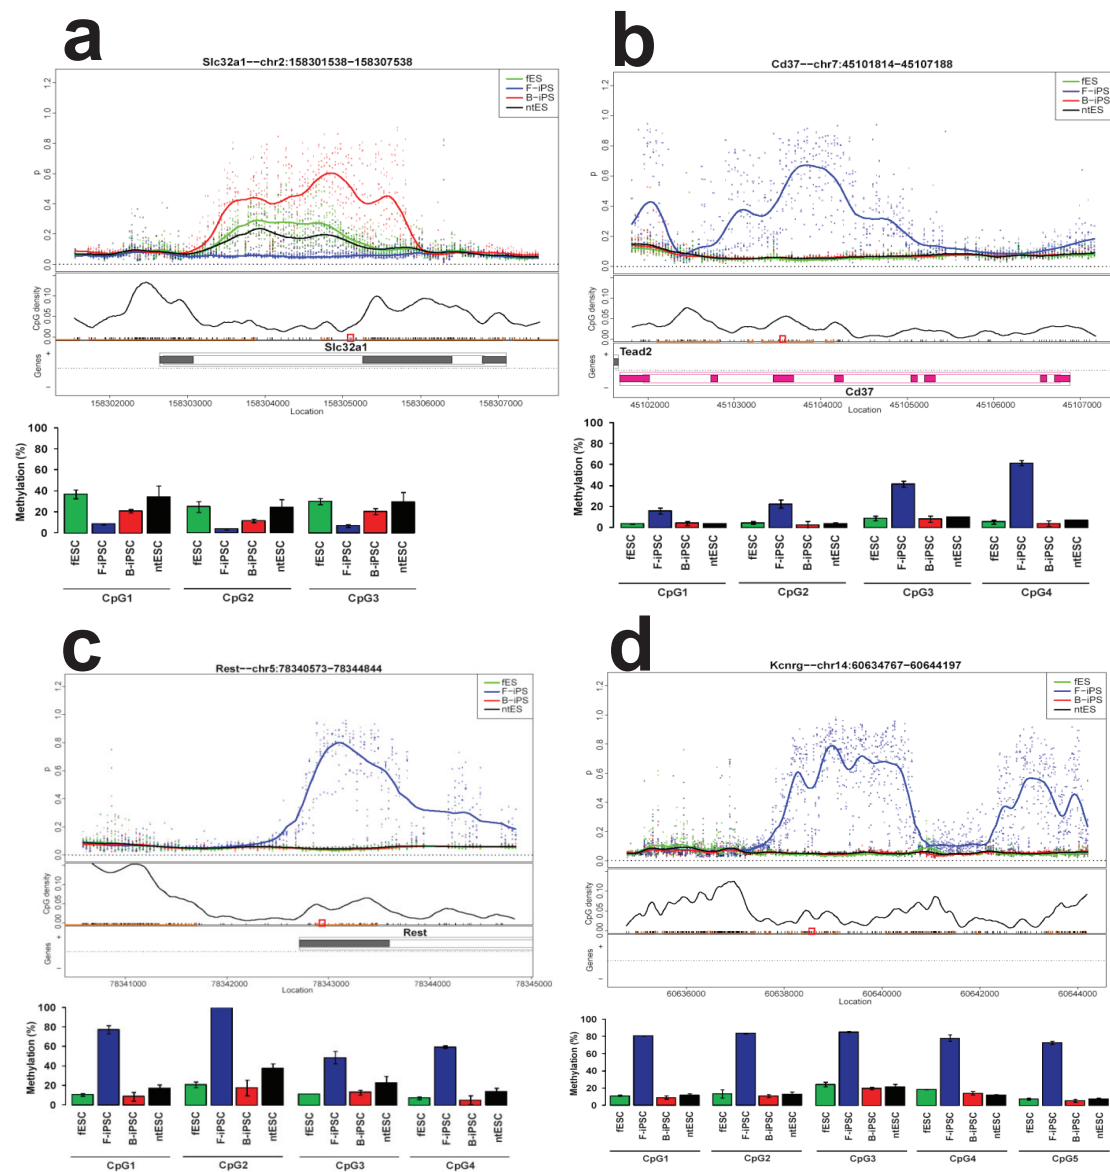

**Supplementary Figure 2 | Examples of differential DNA methylation (upper panels) and confirmation by bisulfite pyrosequencing (lower panels).** The upper panel is a plot of p (percent methylation) value versus genomic location, where the curve represents averaged smoothed p values. The location of CpG dinucleotide (black tick marks on x axis), CpG density (smoothed black line) calculated across the region using a standard density estimator, location of CpG islands (orange line), as well as gene annotation indicating the transcript (thin outer gray line), coding region (thin inner gray line), exons (filled gray box) and gene transcription directionality on the y axis (sense marked as +, antisense as -) are also shown in the upper panels. The lower panel represents the degree of DNA methylation as measured by bisulfite pyrosequencing. The red box indicated on the x axis of the CpG density plot in the upper panels indicates the CpG sites that were measured. Examples are shown for **a**, *Slc32a1*, **b**, *Cd37*, **c**, *Rest*, and **d**, *Kcnrg*.

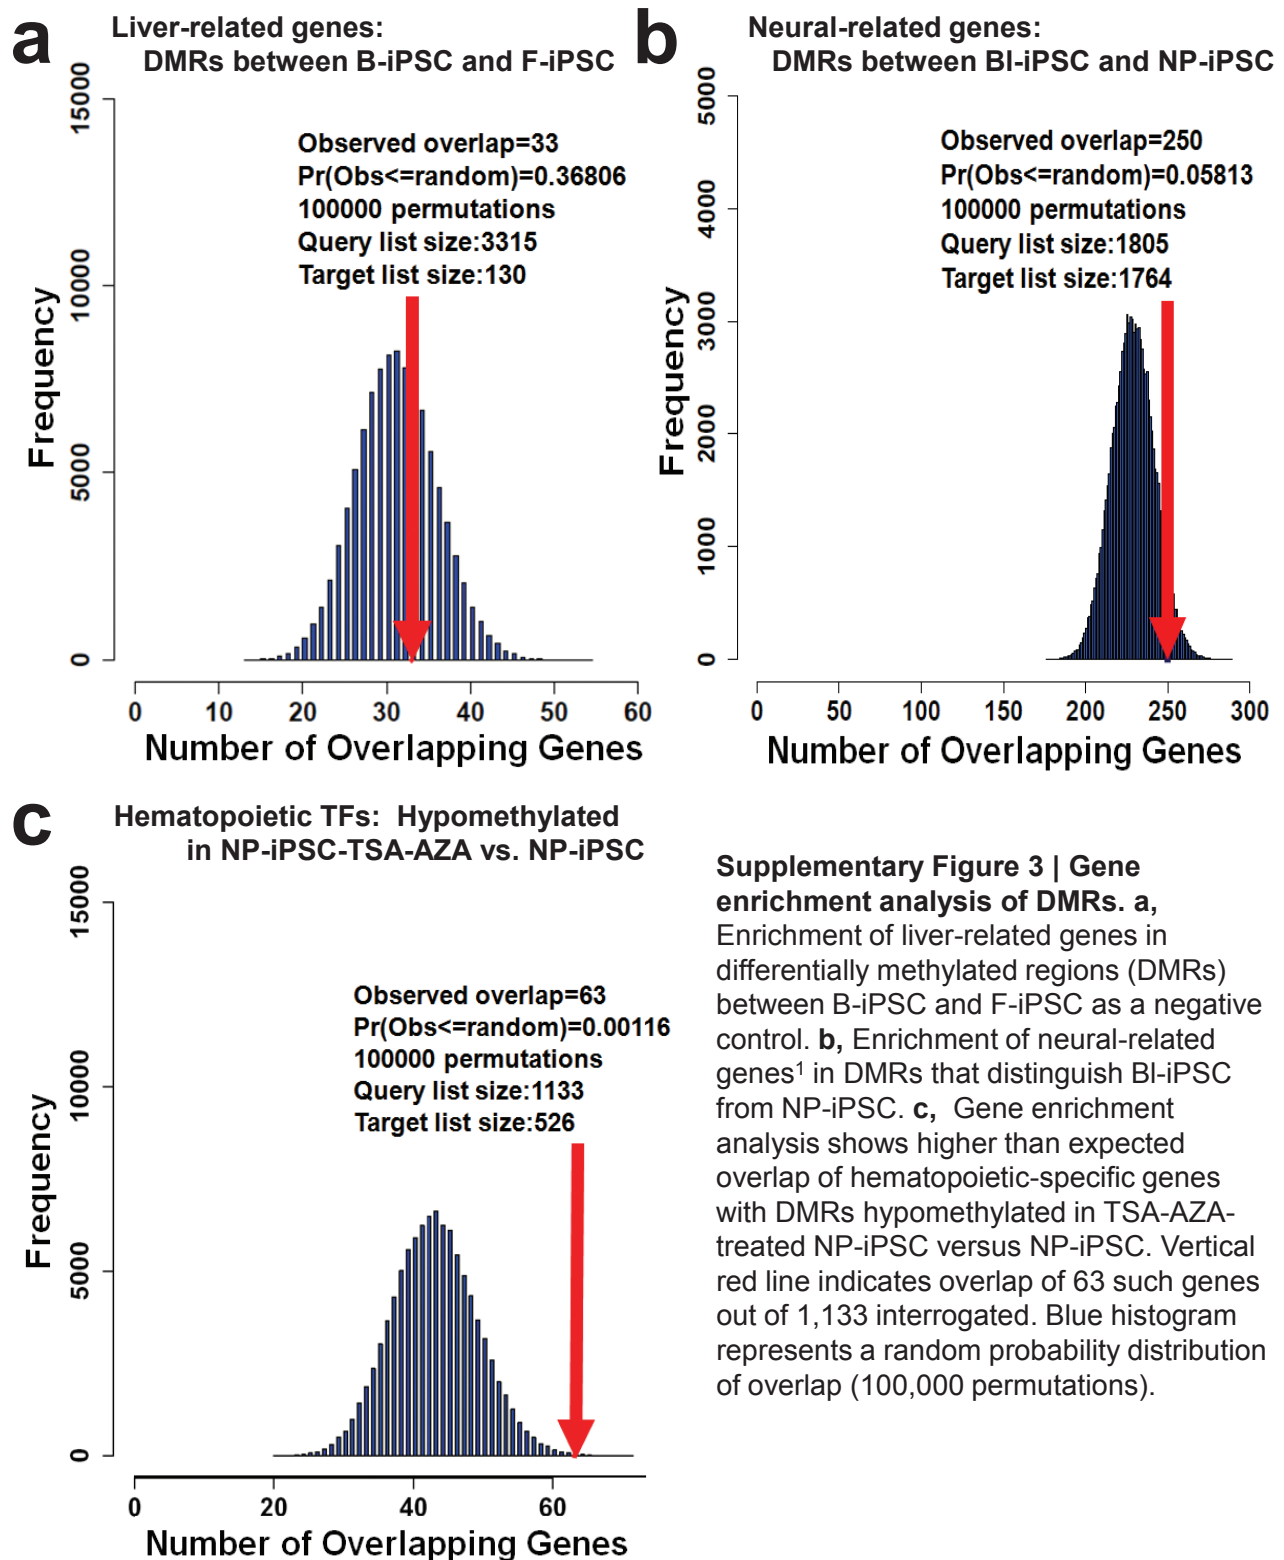



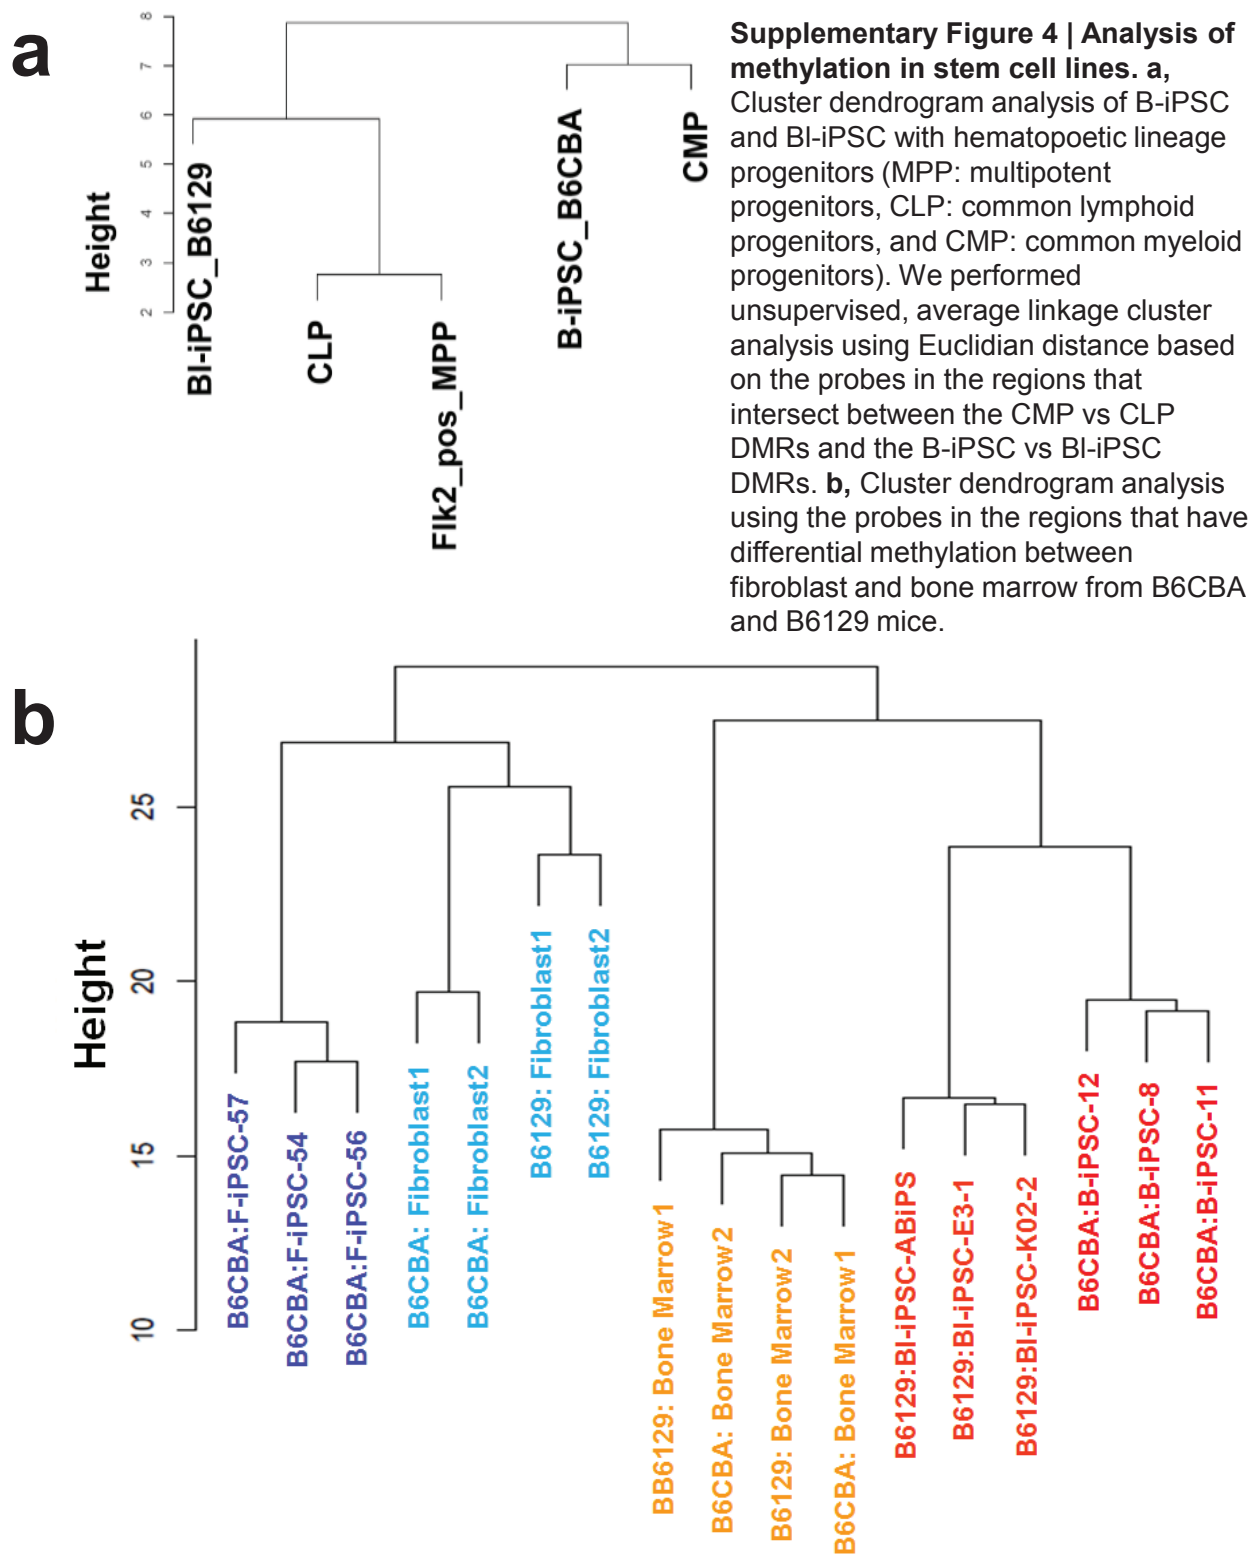



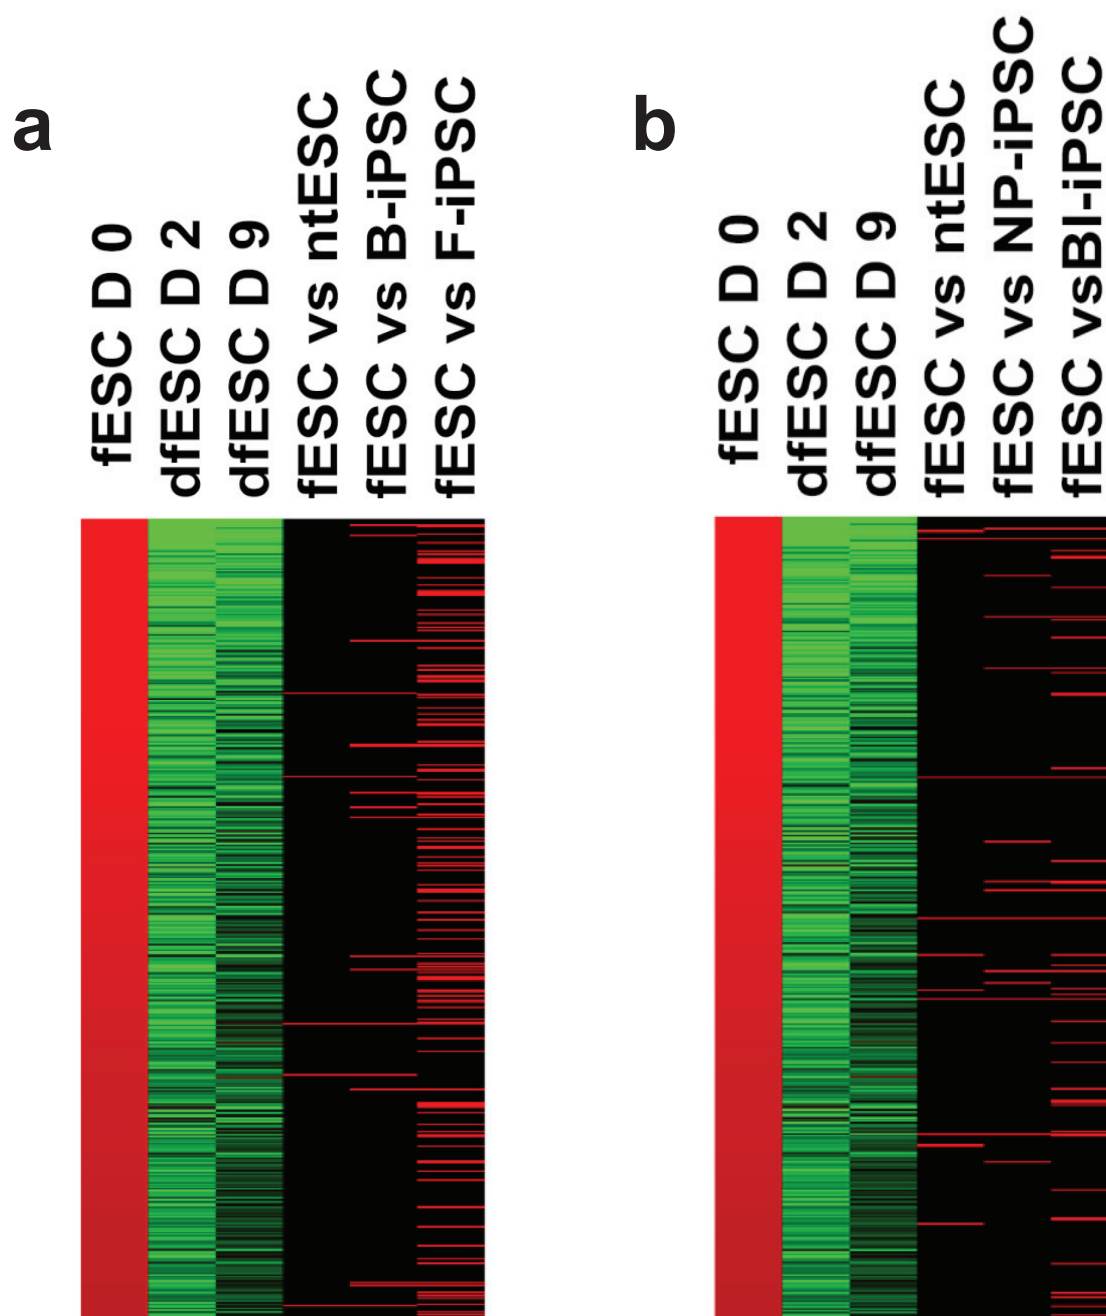

**Supplementary Figure 5 | Overlap of DMRs with loci of genes showing fESC-specific gene expression** (determined from compiled microarray data<sup>2</sup>). Heat maps reflect expression values of fESC-specific genes in undifferentiated state (fESC D0; top 5% highly expressed genes; 554 genes) and after differentiation for 2 and 9 days (differentiated fESC day 2; dfESC D2 and day 9; dfESC D9). **a**, Red bars in the right three lanes indicate number of fESC-specific genes that overlap with DMRs (ntESC, n=5; B-iPSC, n=18; F-iPSC, n=114). **b**, Red bars in the right three lanes indicate number of fESC-specific genes that overlap with DMRs (ntESC, n=12; NP-iPSC, n=16; BI-iPSC, n=45).

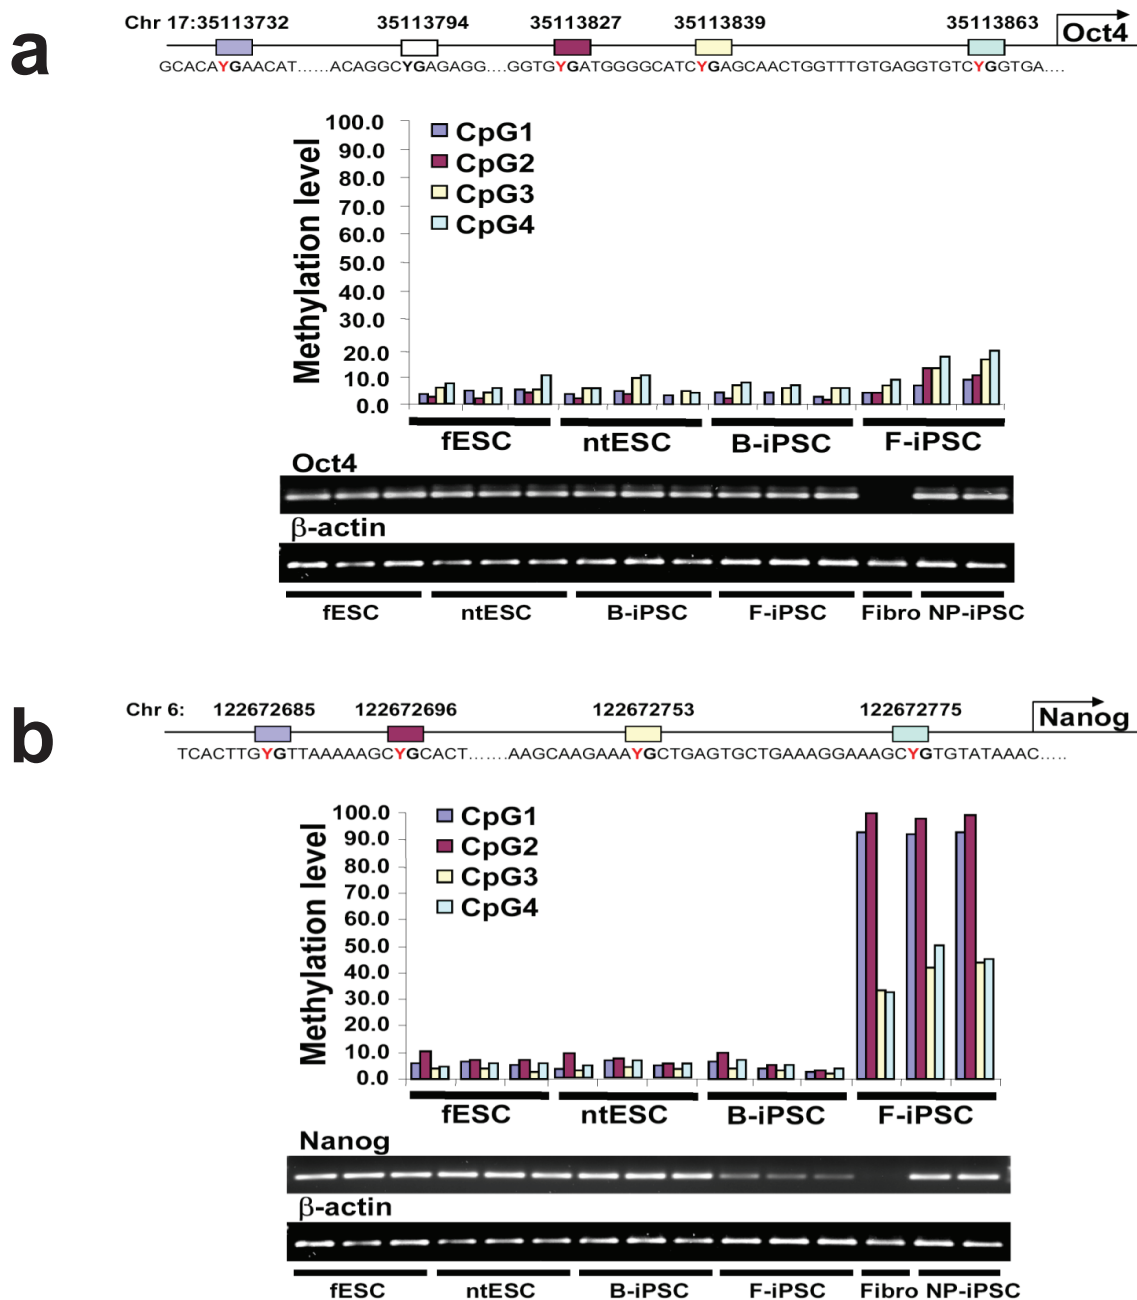

**Supplementary Figure 6 | DNA demethylation of promoters and gene expression on the selected pluripotent gene loci. a, Oct4 b, Nanog.** Schematic structure of the promoters are shown on top, and methylation status of the CpG sites measured by bisulfite pyrosequencing with three independent samples of fESC, ntESC, B-iPSC, and F-iPSC are shown in middle graphs. Detection of Oct4 and Nanog gene expression by RT-PCR with three independent samples of fESC, ntESC, B-iPSC, and F-iPSC are shown below each panel.

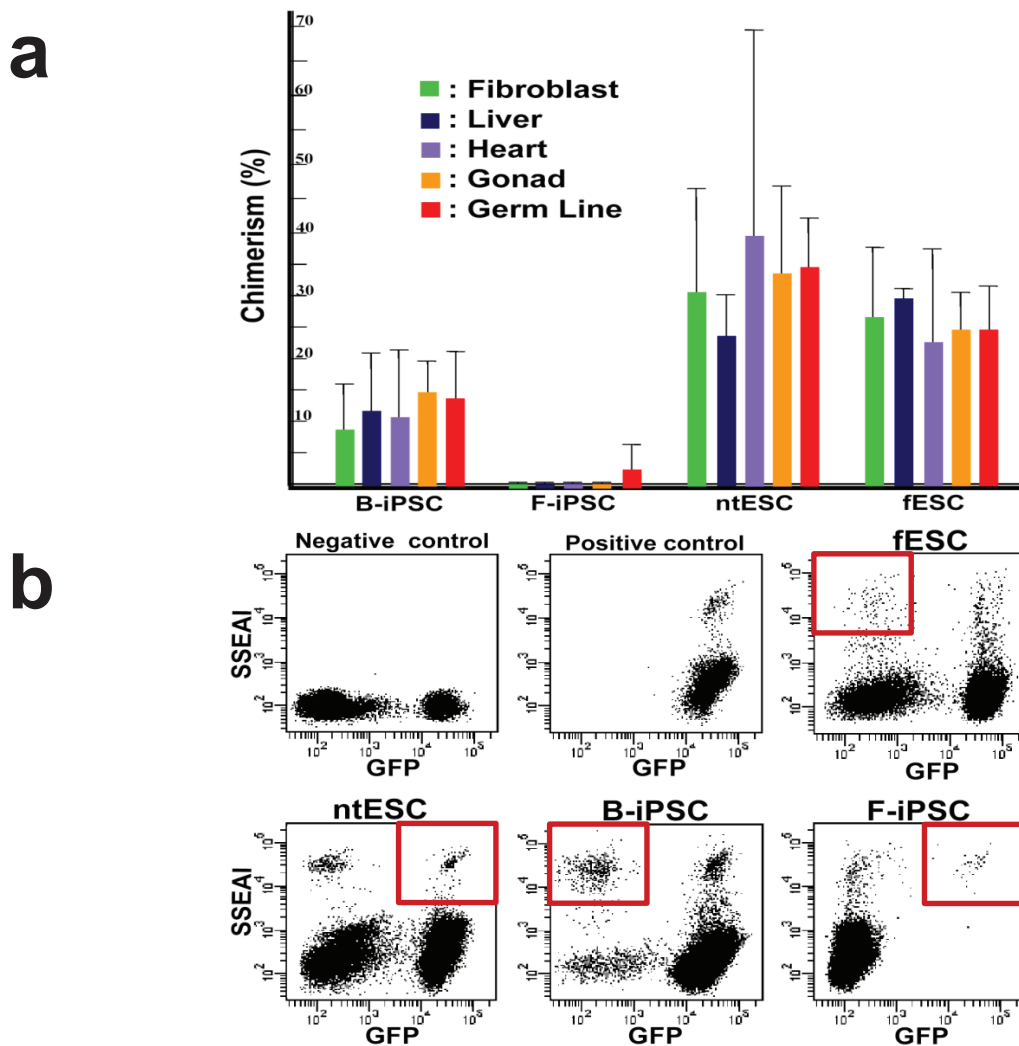

**Supplementary Figure 7 | Chimera analysis of the fESC, ntESC, B-iPSC, and F-iPSC (refer to Fig. 1a).** **a**, Organ chimerism. B6CBA-derived cells were injected into blastocysts and transferred to pseudopregnant mice (N=3 clones of each stem cell type). Organs from E12.5 embryo (B-iPSC, n=14; F-iPSC, n=8; ntESC, n=15; fESC, n=13) were analyzed by flow cytometry to determine % GFP+ cells. Fibroblasts (MEF) were cultured *in vitro* for a week before analysis. The F-iPSC show poor contribution to not only fibroblasts but also to the entire spectrum of tissues, thus suggesting poor incorporation into the blastocyst. *In vivo* chimerism does not obviously reflect lineage bias, but also represents a very different assay from the *in vitro* analysis that is the focus of the paper. Error bars = s.d. **b**, Germline transmission by flow cytometry analysis. Germ cells are represented by SSEA1+ cells of the embryonic gonad. fESC and B-iPSC don't contain GFP markers, but ntESC and F-iPSC harbor GFP markers. Donor cells were discriminated by GFP+ marker from either donor cells or blastocyst. SSEA1+ cells from donor cells were indicated in the red box in the panels. Negative control: SSEA1 staining of heart cells from ntESC chimera mouse; Positive control: SSEA1 staining of gonad cells from GFP+ transgenic mouse.



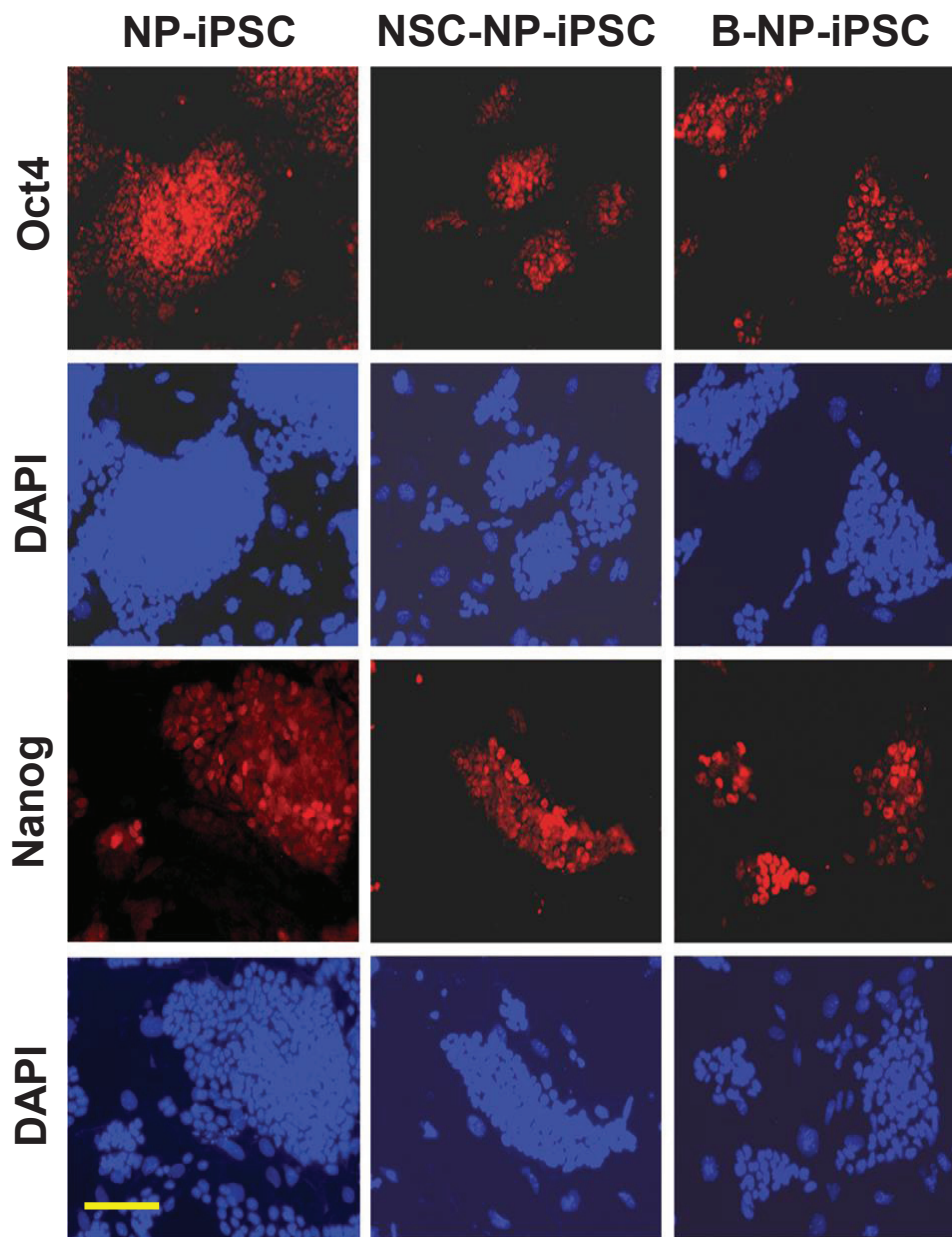

**Supplementary Figure 8 | Immunohistochemistry of NP-iPSC, NSC-NP-iPSC, and B-NP-iPSC for OCT4 and NANOG expression, as indicated.** 4,6-Diamidino-2-phenylindole (DAPI) staining for total cell content. Fibroblasts surrounding pluripotent colonies serve as negative controls for immunohistochemistry staining. Scale bar, 200 $\mu$ m.

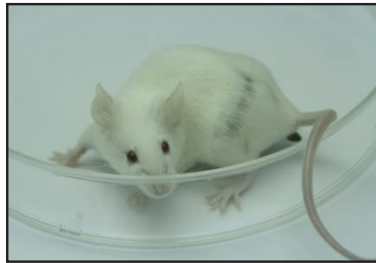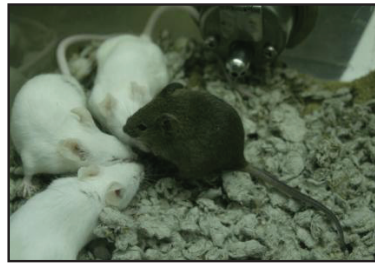

**fESC Chimera and germ line transmission**

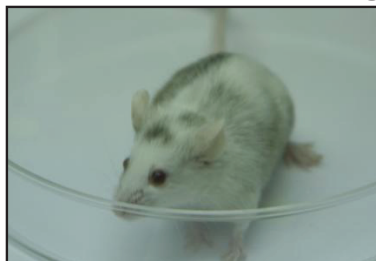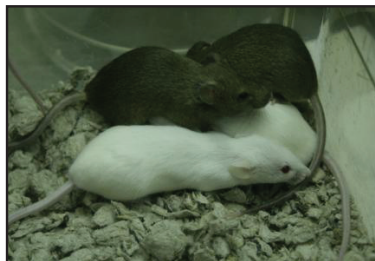

**ntESC chimera and germ line transmission**

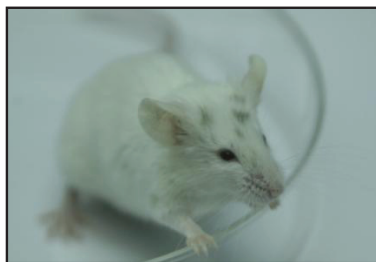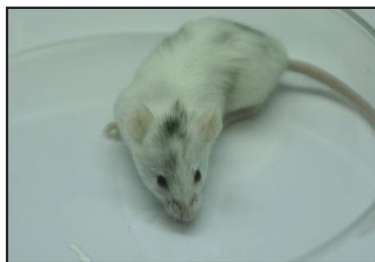

**B-NP-iPSC chimera    NSC-NP-iPSC chimera**

Supplementary Figure 9 | Mouse chimerism and germ line transmission of the fESC, ntESC, B-NP-iPSC, and NSC-NP-iPSC (refer to Fig. 4a).

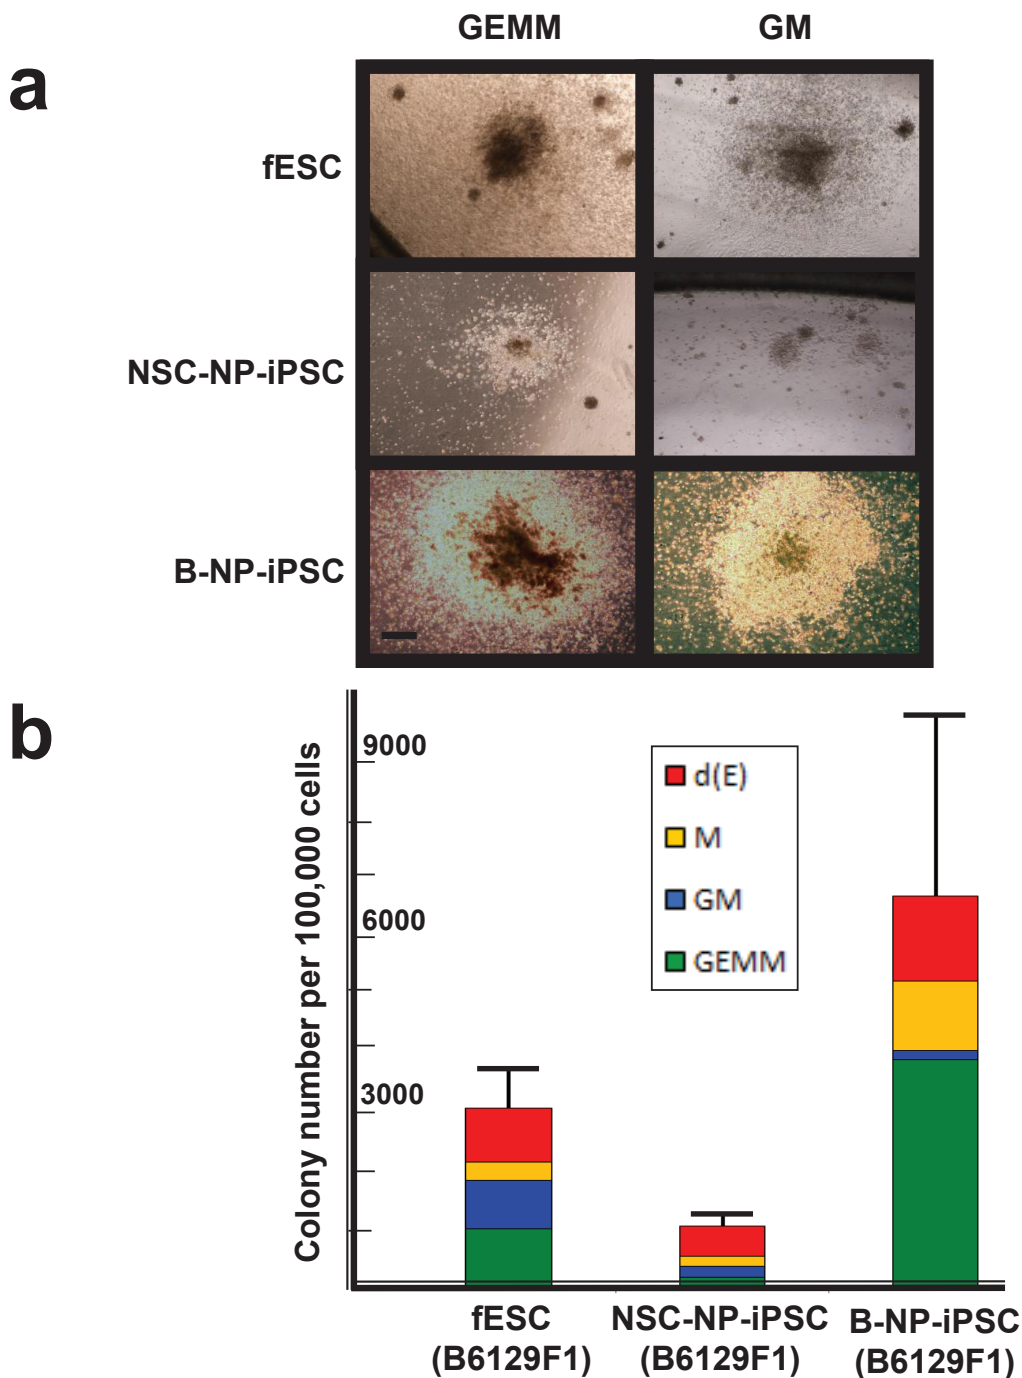

**Supplementary Figure 10 | Hematopoietic colony formation by fESC, NSC-NP-iPSC, and B-NP-iPSC. a,** Different sizes of GEMM and GM colonies in methylcellulose cultures of fESC, NSC-NP-iPSC, and B-NP-iPSC. (40X magnification). Scale bar, 500 $\mu$ m. **b,** Average cell number per colony among 20 randomly picked colonies from fESC, NSC-NP-iPSC, and B-NP-iPSC. Error bars = s.d.



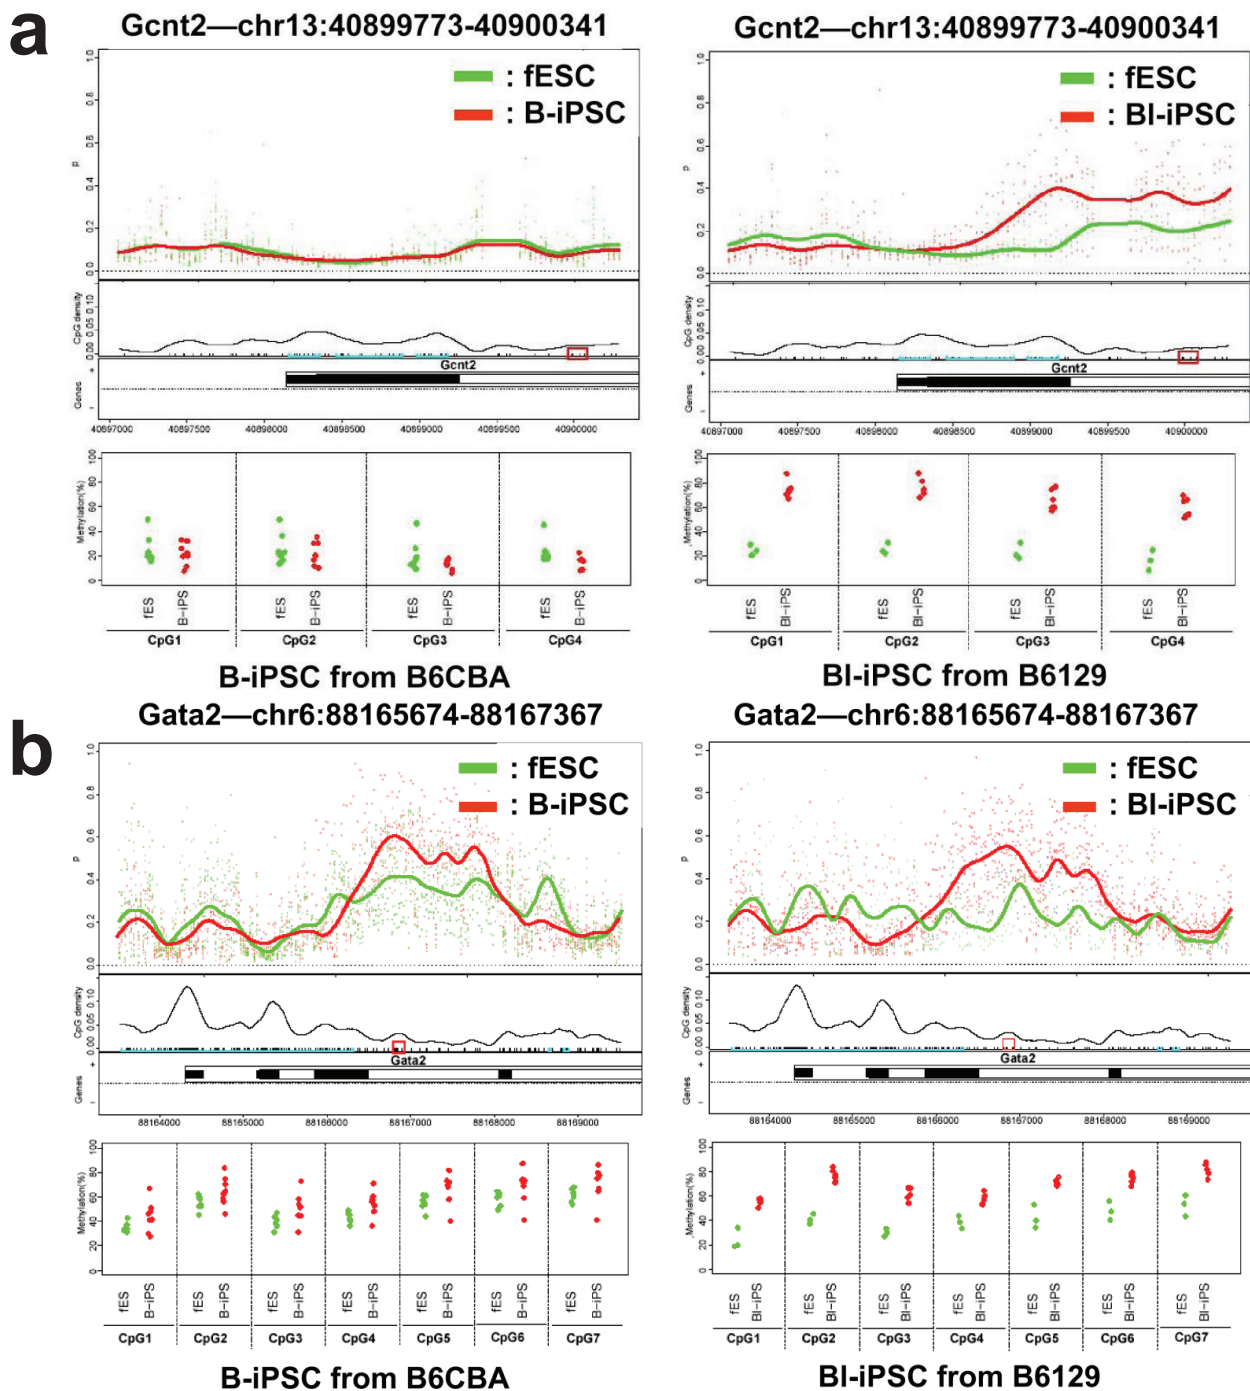

**Supplementary Figure 11 | Residual DNA methylation at hematopoiesis-related loci. a, *Gcnt2* and b, *Gata2* genes show a greater degree of hypermethylation in BI-iPSC relative to fESC compared to B-iPSC vs fESC. Upper panels show CHARM plots, while lower panels represent the degree of DNA methylation (of the CpG sites indicated in the red box in the upper panels) as measured by bisulfite pyrosequencing.**

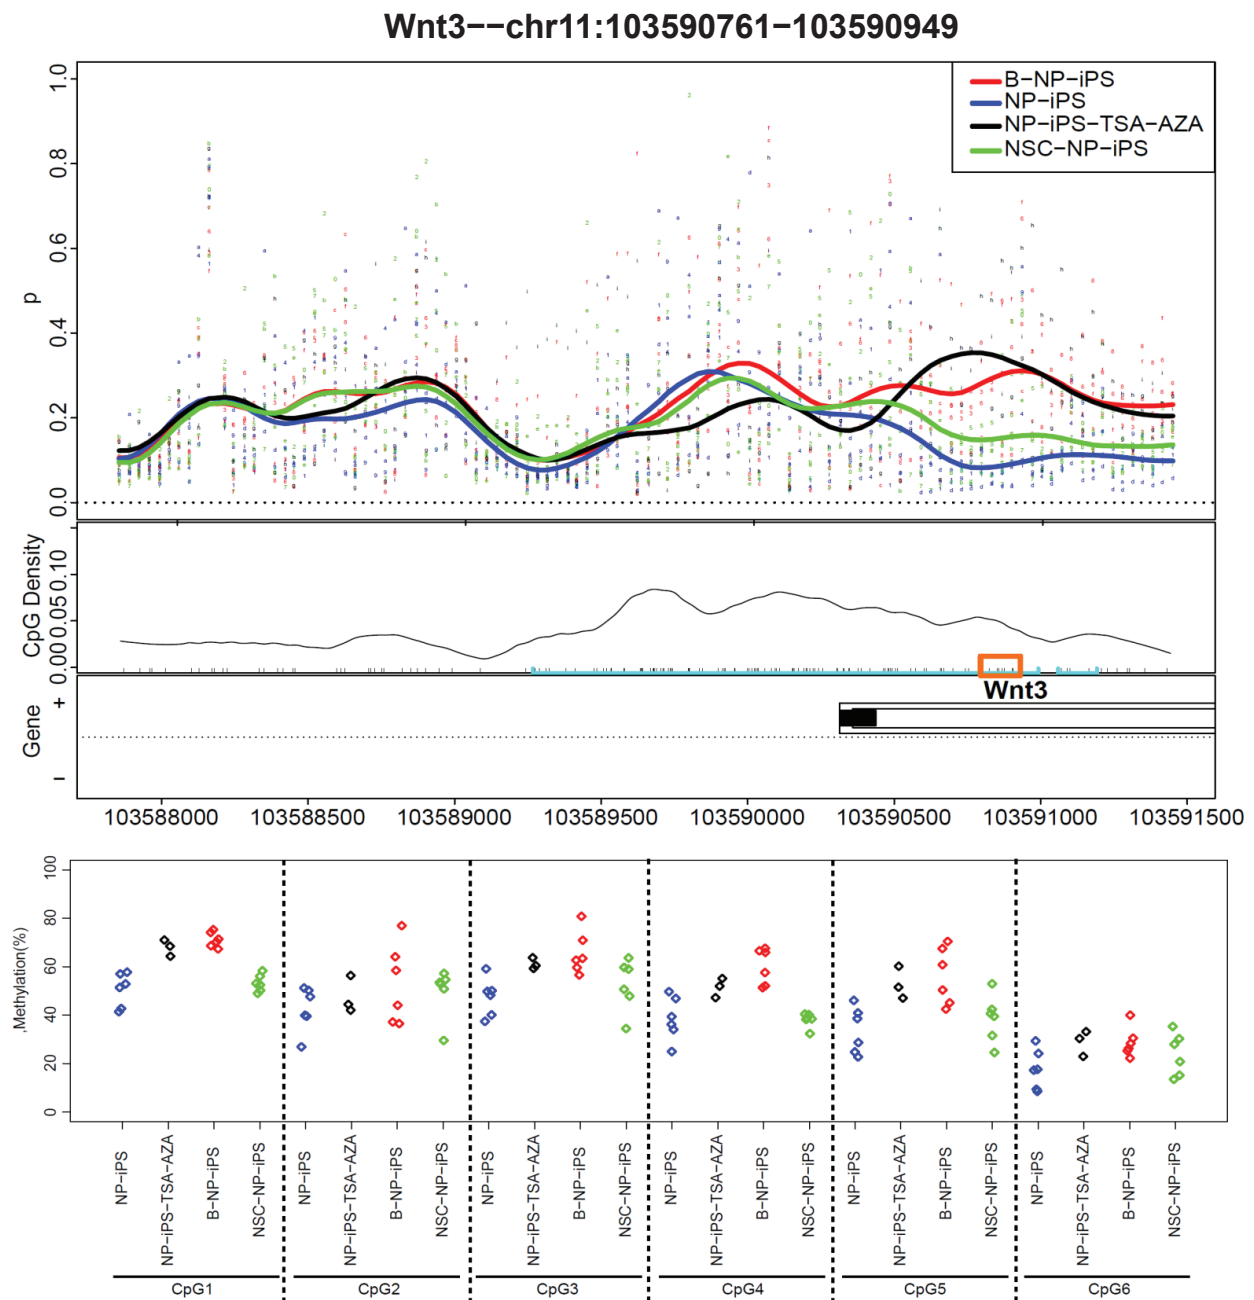

**Supplementary Figure 12 | DNA methylation at Wnt3.** iPSCs that have higher hematopoietic potential (B-NPiPSC and NP-iPSC-TSA-AZA) show a greater degree of Wnt3 gene body methylation<sup>3</sup> than the iPSCs that have lower hematopoietic potential (NSC-NPiPSC and NP-iPSC). Upper panel shows CHARM plots, while lower panel represents the degree of DNA methylation as measured by bisulfite pyrosequencing. The orange box indicated on the x axis of the CpG density plot in the upper panel marks the CpG sites that were measured by bisulfite pyrosequencing.

**a**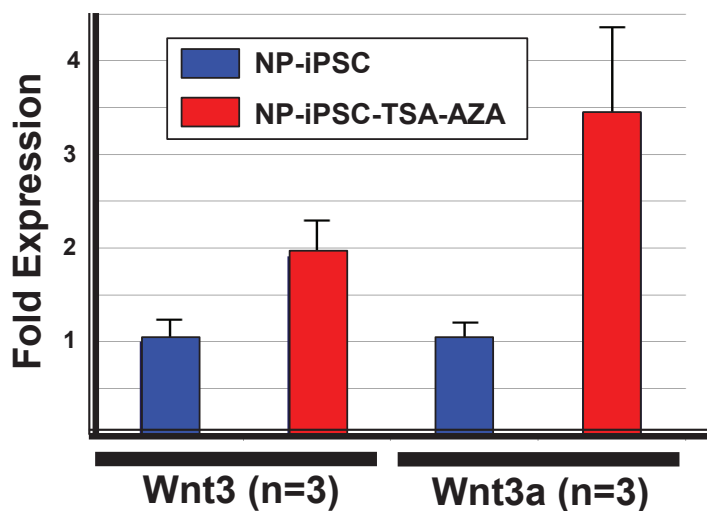**b**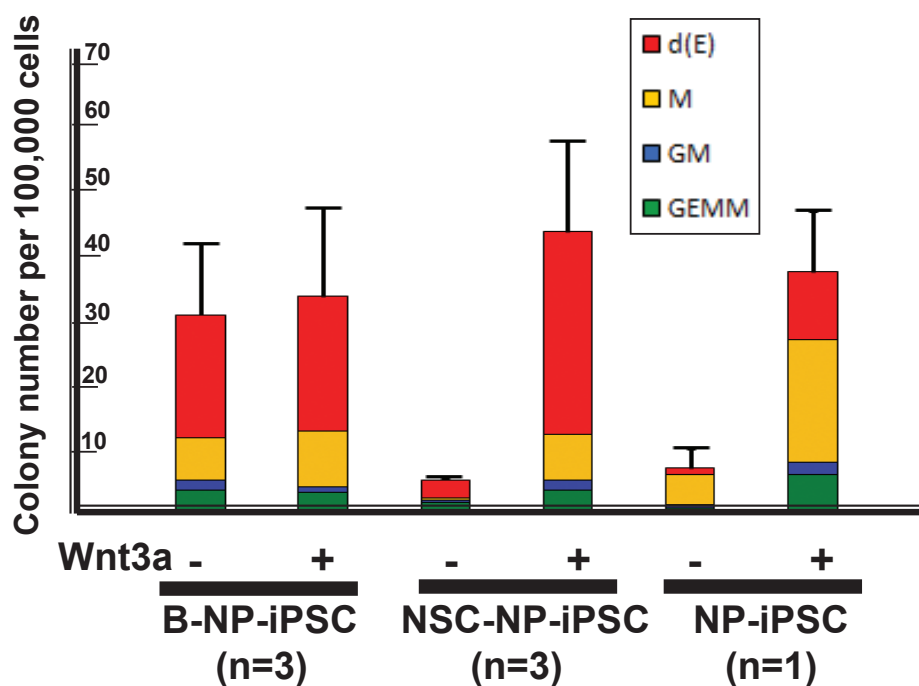

**Supplementary Figure 13 | Relationship of Wnt3/3a on hematopoietic potential of NP-iPSC and NSC-NP-iPSC.** **a**, RNA from EBs differentiated for 3 days were harvested and analyzed by quantitative PCR, after normalization to  $\beta$ -actin. Numbers represent fold expression of NP-iPSC-TSA-AZA (red bar) relative to NP-iPSC (blue bar). **b**, Methylcellulose analysis of blood-forming potential of iPSCs with Wnt3a treatment (+) between day 2-4 of EB differentiation compared to non-treated EBs (-). Error bars = s.d.



**a**

| Comparison        | Number of DMRs | Methylation   | Number of DMRs |
|-------------------|----------------|---------------|----------------|
| fESC vs. F-iPSC   | 5304           | fESC>F-iPSC   | 1955           |
|                   |                | fESC<F-iPSC   | 3349           |
| fESC vs. B-iPSC   | 694            | fESC>B-iPSC   | 178            |
|                   |                | fESC<B-iPSC   | 516            |
| fESC vs. ntESC    | 229            | fESC>ntESC    | 173            |
|                   |                | fESC<ntESC    | 56             |
| F-iPSC vs. B-iPSC | 5202           | F-iPSC>B-iPSC | 2850           |
|                   |                | F-iPSC<B-iPSC | 2352           |
| F-iPSC vs. ntESC  | 6255           | F-iPSC>ntESC  | 4077           |
|                   |                | F-iPSC<ntESC  | 2178           |
| B-iPSC vs. ntESC  | 995            | B-iPSC>ntESC  | 897            |
|                   |                | B-iPSC<ntESC  | 98             |

*\*area cutoff of 2.0.*

**b**

| Comparison          | Number of DMRs | Methylation     | Number of DMRs |
|---------------------|----------------|-----------------|----------------|
| BI-iPSC vs. fESC    | 1485           | BI-iPSC>fESC    | 1423           |
|                     |                | BI-iPSC<fESC    | 62             |
| BI-iPSC vs. NP-iPSC | 2344           | BI-iPSC>NP-iPSC | 2326           |
|                     |                | BI-iPSC<NP-iPSC | 18             |
| BI-iPSC vs. ntESC   | 3053           | BI-iPSC>ntESC   | 3000           |
|                     |                | BI-iPSC<ntESC   | 53             |
| fESC vs. NP-iPSC    | 553            | fESC>NP-iPSC    | 136            |
|                     |                | fESC<NP-iPSC    | 417            |
| fESC vs. ntESC      | 679            | fESC>ntESC      | 399            |
|                     |                | fESC<ntESC      | 280            |
| NP-iPSC vs. ntESC   | 571            | NP-iPSC>ntESC   | 469            |
|                     |                | NP-iPSC<ntESC   | 102            |

*\*area cutoff of 2.0.*

**c**

| Comparison                  | Number of DMRs | Methylation         | Number of DMRs |
|-----------------------------|----------------|---------------------|----------------|
| NP-iPSC vs. NSC-NP-iPSC     | 107            | NP-iPSC>NSC-NP-iPSC | 46             |
|                             |                | NSC-NP-iPSC>NP-iPSC | 61             |
| NP-iPSC vs. B-NP-iPSC       | 803            | NP-iPSC>B-NP-iPSC   | 593            |
|                             |                | B-NP-iPSC>NP-iPSC   | 210            |
| NP-iPSC vs. NP-iPSC-TSA-AZA | 938            | NP-iPSC             | 626            |
|                             |                | >NP-iPSC-TSA-AZA    |                |
|                             |                | NP-iPSC-TSA-AZA     | 312            |
| NSC-NP-iPSC vs. B-NP-iPSC   | 688            | >NP-iPSC            |                |
|                             |                | NSC-NP-iPSC         | 632            |
|                             |                | >B-NP-iPSC          |                |
|                             |                | B-NP-iPSC           | 56             |
|                             |                | >NSC-NP-iPSC        |                |

*\* area cutoff of 2.0.*

**Supplementary Table 1 | . DMRs by CHARM analysis. a**, fESC, ntESC, B-iPSC, and F-iPSC (refer to Fig. 1a), **b**, fESC, ntESC, NP-iPSC, and BI-iPSC (refer to Fig. 4a upper schema), **c**, NP-iPSC, NSC-NP-iPSC, NP-iPSC-TSA-AZA, and B-NP-iPSC (refer to Fig. 4a lower schema).

| Rank | Gene     | Function                                                                     | Reference |
|------|----------|------------------------------------------------------------------------------|-----------|
| 1    | Kcnrg    |                                                                              |           |
| 2    | Mast1    |                                                                              |           |
| 3    | Mab21L1  | Osteogenetic differentiation                                                 | 4         |
| 4    | Atbf1    | Myb mediated hematopoietic growth regulation                                 | 5         |
| 5    | Hand1    | Cardiac development                                                          | 6         |
| 6    | Zfp423   | Enhance Hematopoietic activity                                               | 7         |
| 7    | Pcdhga10 | protocadherin                                                                | 8         |
| 8    | Dlx1     | Hematopoietic development with BMP4                                          | 9         |
| 9    | Pim1     | Hematopoietic proliferation                                                  | 10        |
| 10   | Efnb2    | Developmental events, especially in the nervous system and in erythropoiesis | 11        |
| 11   | Asns     | Hematopoietic proliferation                                                  | 12        |
| 12   | Tradd    | programmed cell death                                                        | 13        |
| 13   | Ebf2     | Osteogenetic differentiation                                                 | 14        |
| 14   | Slc13a4  | Sodium/sulfate cotransporter                                                 | 15        |
| 15   | Osr2     | Osteogenetic development                                                     | 16        |
| 16   | Igsf4c   | Immunoglobulin superfamily                                                   | 17        |
| 17   | Meis1    | Definitive hematopoiesis                                                     | 18        |
| 18   | CD37     | T cell B cell interaction and proliferation                                  | 19 20     |
| 19   | Slc38a4  |                                                                              |           |
| 20   | Pcdhga12 | Protocadherin                                                                | 8         |
| 21   | Pcdhga7  | Protocadherin                                                                | 8         |
| 22   | Map2k7   | Hematopoietic growth                                                         | 21        |
| 23   | Sall4    | Bmi-1 mediated hematopoietic self-renewal                                    | 22        |
| 24   | Pcdhgb6  | Protocadherin                                                                | 8         |

**Supplementary Table 2 | Top 24 Differentially Methylated Regions (DMRs) between B-iPSC and F-iPSC.** Blood-related genes are shaded in red; bone-related genes are shaded in light brown.

|          |      |        |      |      |        |       |        |         |
|----------|------|--------|------|------|--------|-------|--------|---------|
| aff1     | ccnk | gas7   | irf1 | irf8 | myc    | runx1 | sp4    | zfp3611 |
| arhgap17 | elf1 | hhex   | irf2 | klf6 | nfe2l2 | runx3 | stat1  |         |
| bcl3     | etv3 | ifnar2 | irf5 | lyl1 | rbl1   | sirt7 | stat6  |         |
| bcor     | fli1 | ikbkb  | irf7 | mtpn | rela   | smad2 | zfp182 |         |

Supplementary Table 3 | Hematopoiesis-related transcription factors that are differentially methylated in F-iPSC vs B-iPSC (Fig. 1a), NP-iPSC vs BI-iPSC (Fig. 4a upper schema), and/or NSC-NP-iPSC vs B-NP-iPSC (Fig. 4a lower schema).



| Methylation                                                                                                                   |                          | DN3 > MPP <sup>FL-</sup><br>(496) | DN3 < MPP <sup>FL-</sup><br>(237) | GMP > MPP <sup>FL-</sup><br>(177) | GMP < MPP <sup>FL-</sup><br>(567) | DN3 > GMP<br>(706) | DN3 < GMP<br>(207) |
|-------------------------------------------------------------------------------------------------------------------------------|--------------------------|-----------------------------------|-----------------------------------|-----------------------------------|-----------------------------------|--------------------|--------------------|
| DMRs between<br>B-iPSC and fESC<br>(B6/CBA; B-iPSC<br>derived from Kit+,<br>lineage-negative<br>myeloid marrow<br>precursors) | B-iPSC > fESC<br>(516)   | 10                                | 3                                 | 7                                 | 2                                 | 5                  | 3                  |
|                                                                                                                               | B-iPSC < fESC<br>(178)   | 2                                 | 1                                 | 0                                 | 5                                 | 0                  | 0                  |
| DMRs between<br>BI-iPSC and fESC<br>(B6/129; BI-iPSC<br>derived from B<br>lymphocytes )                                       | BI-iPSC > fESC<br>(1423) | 20                                | 13                                | 6                                 | 20                                | 31                 | 6                  |
|                                                                                                                               | BI-iPSC < fESC<br>(62)   | 0                                 | 0                                 | 0                                 | 0                                 | 0                  | 0                  |

DN3 is T cell lineage committed  
GMP is myeloid lineage committed  
Flk2<sup>+</sup> is the multipotent progenitor

**Supplementary Table 4 | Comparison of DMRs that distinguish MPP<sup>FL-</sup> from DN3, MPP<sup>FL-</sup> from GMP, and DN3 from GMP, with two groups of blood-derived iPSC (B-iPSC and BI-iPSC) compared to fESC.** Multiple comparisons were made to ascertain any correlation in the direction of DNA methylation changes from the two sets of data. MPP (multipotent progenitors), CLP (common lymphoid progenitors), CMP (common myeloid progenitors), GMP (granulocyte/monocyte progenitors), and DN3 (thymocyte progenitors).

| Cut AREA: 5             | Genes        | DMRs in B6/CBAF1 mouse (refer to Fig. 1a) |                |                |
|-------------------------|--------------|-------------------------------------------|----------------|----------------|
| Number of Common target |              | fESC vs ntESC                             | fESC vs B-iPSC | fESC vs F-iPSC |
| 7 Core factor           | 47           | 0                                         | 0              | 11             |
| 6 Core factor           | 100          | 0                                         | 1              | 25             |
| 5 Core factor           | 124          | 0                                         | 1              | 24             |
| 4 Core factor           | 227          | 0                                         | 2              | 42             |
| 3 Core factor           | 427          | 0                                         | 0              | 56             |
| 2 Core factor           | 901          | 0                                         | 4              | 143            |
| 1 Core factor           | 2350         | 2                                         | 16             | 332            |
| 0 Core factor           | 9686         | 14                                        | 79             | 1077           |
| <b>Total DMRs</b>       | <b>13862</b> | <b>16</b>                                 | <b>103</b>     | <b>1710</b>    |

| Cut AREA: 5             | Genes        | DMRs in B6/129F1 mouse (refer to Fig. 4a upper schema) |                 |                 |
|-------------------------|--------------|--------------------------------------------------------|-----------------|-----------------|
| Number of Common target |              | fESC vs ntESC                                          | fESC vs NP-iPSC | fESC vs BI-iPSC |
| 7 Core factor           | 47           | 0                                                      | 0               | 1               |
| 6 Core factor           | 100          | 2                                                      | 2               | 3               |
| 5 Core factor           | 124          | 0                                                      | 0               | 3               |
| 4 Core factor           | 227          | 1                                                      | 2               | 7               |
| 3 Core factor           | 427          | 4                                                      | 3               | 11              |
| 2 Core factor           | 901          | 6                                                      | 6               | 22              |
| 1 Core factor           | 2350         | 13                                                     | 13              | 49              |
| 0 Core factor           | 9686         | 34                                                     | 53              | 189             |
| <b>Total DMRs</b>       | <b>13862</b> | <b>60</b>                                              | <b>79</b>       | <b>285</b>      |

**Supplementary Table 5 | DMRs and pluripotency network genes defined by fESC core factor co-occupancy.** Correlation between seven core factor co-occupancy on their target genes<sup>23</sup> and DMRs generated from each comparison set were tested to define the functionally linked DMRs in pluripotent network genes. Core factors tested in this analysis are Nanog, Sox2, Oct4, Klf4, Dax1, Nac1, and Zfp281, and the number of DMRs found in each gene set defined by target co-occupancy (by 7 TFs to 0 TF) is shown.

**Supplementary Table 6 | List of pluripotent stem cells and their characterization.** A "xxx" represents a relative degree of expression level or demethylation level. Blank indicates "not determined". "Yes" indicates "confirmed". Germ cell transmission was determined as follows: Birth of marked pups from mating of chimeric animals is indicated "Yes"; birth of pups following tetraploid embryo complementation is indicated "4N complementation"; detection of donor-marked SSEA1+ presumptive germ cells isolated from the gonadal ridge of chimeric embryos, as determined by flow cytometry is indicated as "Yes (gonad)".  $\beta$  symbol in donor tissue type indicates "carries beta thal deletion".

| cell line       | Tissue donor stain | donor tissue type    | passage number | teratoma formation | Oct4 transcription | Nonog transcription | Oct4 promoter demethylation | Nanog promoter demethylation | immunohistochemistry Oct4/Nanog | chimera | germ cell transmission   |
|-----------------|--------------------|----------------------|----------------|--------------------|--------------------|---------------------|-----------------------------|------------------------------|---------------------------------|---------|--------------------------|
| <b>iESC</b>     |                    |                      |                |                    |                    |                     |                             |                              |                                 |         |                          |
| iESC-A          | B6CBAF1            | blastocyst           | 3 ~ 7          | xxx                |                    |                     |                             |                              |                                 |         |                          |
| iESC-B          | B6CBAF1            | blastocyst           | 3 ~ 7          | xxx                |                    |                     |                             |                              |                                 |         |                          |
| iESC-C          | B6CBAF1            | blastocyst           | 3 ~ 7          | xxx                | xxx                | xxx                 | xxx                         | xxx                          | xxx                             | Yes     | Yes                      |
| iESC-D          | B6CBAF1            | blastocyst           | 3 ~ 7          | xxx                |                    |                     |                             |                              |                                 |         |                          |
| iESC-E          | B6CBAF1            | blastocyst           | 3 ~ 7          | xxx                | xxx                | xxx                 | xxx                         | xxx                          | xxx                             | Yes     | Yes                      |
| iESC-F          | B6CBAF1            | blastocyst           | 3 ~ 7          | xxx                | xxx                | xxx                 | xxx                         | xxx                          | xxx                             | Yes     | Yes                      |
| iESC-G          | B6CBAF1            | blastocyst           | 3 ~ 7          | xxx                |                    |                     |                             |                              |                                 |         |                          |
| iESC-I          | B6CBAF1            | blastocyst           | 3 ~ 7          | xxx                |                    |                     |                             |                              |                                 |         |                          |
| iESC-PGEE2-1    | B6129F1            | blastocyst           | 3 ~ 6          | xxx                |                    |                     |                             |                              |                                 | Yes     | Yes                      |
| iESC-PGEE2-2    | B6129F1            | blastocyst           | 3 ~ 6          | xxx                |                    |                     |                             |                              |                                 | Yes     | Yes                      |
| iESC-V6.5       | B6129F1            | blastocyst           | 9 ~ 11         | xxx                |                    | xxx                 | xxx                         | xxx                          | xxx                             | Yes     | Yes (4n complementation) |
| <b>ntESC</b>    |                    |                      |                |                    |                    |                     |                             |                              |                                 |         |                          |
| ntESC-B1        | B6CBAF1            | fibroblast           | 3 ~ 7          | xxx                | xxx                | xxx                 | xxx                         | xxx                          | xxx                             | Yes     | Yes                      |
| ntESC-B3        | B6CBAF1            | fibroblast           | 3 ~ 7          | xxx                |                    |                     |                             |                              |                                 |         |                          |
| ntESC-F1        | B6CBAF1            | fibroblast           | 3 ~ 7          | xxx                |                    |                     |                             |                              |                                 |         |                          |
| ntESC-O         | B6CBAF1            | fibroblast           | 3 ~ 7          | xxx                | xxx                | xxx                 | xxx                         | xxx                          | xxx                             | Yes     | Yes                      |
| ntESC-V1        | B6CBAF1            | fibroblast           | 3 ~ 7          | xxx                | xxx                | xxx                 | xxx                         | xxx                          | xxx                             | Yes     | Yes                      |
| ntESC-V2        | B6CBAF1            | fibroblast           | 3 ~ 7          | xxx                | xxx                | xxx                 | xxx                         | xxx                          | xxx                             | Yes     | Yes                      |
| ntESC-V3        | B6CBAF1            | fibroblast           | 3 ~ 7          | xxx                |                    |                     |                             |                              |                                 |         |                          |
| ntESC-NGFP      | B6129F1            | embryonic fibroblast | 11             | xxx                |                    |                     |                             |                              |                                 | Yes     | Yes (4n complementation) |
| ntESC-LN1       | B6D2F1             | B cell               | 5 ~ 8          | xxx                |                    |                     |                             |                              |                                 | Yes     | Yes (4n complementation) |
| ntESC-LN2       | B6129F1            | T cell               | 5 ~ 8          | xxx                |                    |                     |                             |                              |                                 | Yes     | Yes (4n complementation) |
| ntESC-LN3       | B6129F1            | T cell               | 5 ~ 8          | xxx                |                    |                     |                             |                              |                                 | Yes     | Yes (4n complementation) |
| ntESC-Rag2      | B6129F1            | fibroblast           | 5 ~ 8          | xxx                |                    |                     |                             |                              |                                 | Yes     | Yes (4n complementation) |
| ntESC-V6.5NSCB1 | B6129F1            | neural stem cell     | 5 ~ 8          | xxx                |                    |                     |                             |                              |                                 | Yes     | Yes (4n complementation) |
| ntESC-V6.5NSCB2 | B6129F1            | neural stem cell     | 5 ~ 8          | xxx                |                    |                     |                             |                              |                                 | Yes     | Yes (4n complementation) |

| cell line        | Tissue donor stain | donor tissue type          | passage number | teratoma formation | Oct4 transcription | Nonog transcription | Oct4 promoter demethylation | Nanog promoter demethylation | immunohistochemistry Oct4/Nanog | chimera | germ cell transmission |
|------------------|--------------------|----------------------------|----------------|--------------------|--------------------|---------------------|-----------------------------|------------------------------|---------------------------------|---------|------------------------|
| <b>iPSC</b>      |                    |                            |                |                    |                    |                     |                             |                              |                                 |         |                        |
| F-IPSC1          | B6BAF1             | fibroblast $\beta$         | 3 ~ 7          | xxx                | xxx                | xx                  | xxx                         | xxx                          | xxx                             | Yes     | Yes (gonad)            |
| F-IPSC13         | B6BAF1             | fibroblast $\beta$         | 3 ~ 7          | xxx                | xxx                | xx                  | xxx                         | xxx                          | xxx                             | Yes     | Yes (gonad)            |
| F-IPSC16         | B6BAF1             | fibroblast $\beta$         | 3 ~ 7          | xxx                | xxx                | xx                  | xxx                         | xxx                          | xxx                             | Yes     | Yes (gonad)            |
| F-IPSC34         | B6BAF1             | fibroblast $\beta$         | 3 ~ 7          | xxx                |                    |                     |                             |                              |                                 |         |                        |
| F-IPSC36         | B6BAF1             | fibroblast $\beta$         | 3 ~ 7          | xxx                |                    |                     |                             |                              |                                 |         |                        |
| F-IPSC37         | B6BAF1             | fibroblast $\beta$         | 3 ~ 7          | xxx                |                    |                     |                             |                              |                                 |         |                        |
| F-IPSC39         | B6BAF1             | fibroblast $\beta$         | 3 ~ 7          | xxx                |                    |                     |                             |                              |                                 |         |                        |
| F-IPSC63         | B6BAF1             | fibroblast $\beta$         | 3 ~ 7          | xxx                |                    |                     |                             |                              |                                 |         |                        |
| B-IPSC2          | B6BAF1             | hematopoietic cell $\beta$ | 3 ~ 7          | xxx                | xxx                | xxx                 | xxx                         | xxx                          | xxx                             | Yes     | Yes (gonad)            |
| B-IPSC6          | B6BAF1             | hematopoietic cell $\beta$ | 3 ~ 7          | xxx                | xxx                | xxx                 | xxx                         | xxx                          | xxx                             | Yes     | Yes (gonad)            |
| B-IPSC8          | B6BAF1             | hematopoietic cell $\beta$ | 3 ~ 7          | xxx                | xxx                | xxx                 | xxx                         | xxx                          | xxx                             | Yes     | Yes (gonad)            |
| B-IPSC10         | B6BAF1             | hematopoietic cell $\beta$ | 3 ~ 7          | xxx                | xxx                | xxx                 | xxx                         | xxx                          | xxx                             | Yes     | Yes (gonad)            |
| B-IPSC11         | B6BAF1             | hematopoietic cell $\beta$ | 3 ~ 7          | xxx                | xxx                | xxx                 | xxx                         | xxx                          | xxx                             | Yes     | Yes (gonad)            |
| B-IPSC12         | B6BAF1             | hematopoietic cell $\beta$ | 3 ~ 7          | xxx                |                    |                     |                             |                              |                                 |         |                        |
| B-IPSC15         | B6BAF1             | hematopoietic cell $\beta$ | 3 ~ 7          | xxx                |                    |                     |                             |                              |                                 |         |                        |
| B-IPSC16         | B6BAF1             | hematopoietic cell $\beta$ | 3 ~ 7          | xxx                |                    |                     |                             |                              |                                 |         |                        |
| B-IPSC18         | B6BAF1             | hematopoietic cell $\beta$ | 3 ~ 7          | xxx                |                    |                     |                             |                              |                                 |         |                        |
| BI-IPSC-ABiPS    | B6129F1            | B cell                     | 6 ~ 8          | xxx                | xxx                | xxx                 | xxx                         | xxx                          | xxx                             | Yes     | Yes                    |
| BI-IPSC-E2-1     | B6129F1            | B cell                     | 6 ~ 8          | xxx                | xxx                | xxx                 | xxx                         | xxx                          | xxx                             | Yes     | Yes                    |
| BI-IPSC-K02-2    | B6129F1            | B cell                     | 6 ~ 8          | xxx                | xxx                | xxx                 | xxx                         | xxx                          | xxx                             | Yes     | Yes                    |
| BI-IPSC-K01-2    | B6129F1            | B cell                     | 6 ~ 8          | xxx                | xxx                | xxx                 | xxx                         | xxx                          | xxx                             | Yes     | Yes                    |
| BI-IPSC-BiPS54   | B6129F1            | B cell                     | 6 ~ 8          | xxx                | xxx                | xxx                 | xxx                         | xxx                          | xxx                             | Yes     | Yes                    |
| BI-IPSC-E3-1     | B6129F1            | B cell                     | 6 ~ 8          | xxx                | xxx                | xxx                 | xxx                         | xxx                          | xxx                             | Yes     | Yes                    |
| NP-IPSC0         | B6129F1            | neural progenitor cell     | 6 ~ 8          | xxx                | xxx                | xxx                 | xxx                         | xxx                          | xxx                             | Yes     | Yes                    |
| NP-IPSC1         | B6129F1            | neural progenitor cell     | 2 ~ 5          | xxx                | xxx                | xxx                 | xxx                         | xxx                          | xxx                             |         |                        |
| NP-IPSC2         | B6129F1            | neural progenitor cell     | 2 ~ 5          | xxx                | xxx                | xxx                 | xxx                         | xxx                          | xxx                             |         |                        |
| NP-IPSC3         | B6129F1            | neural progenitor cell     | 2 ~ 5          | xxx                | xxx                | xxx                 | xxx                         | xxx                          | xxx                             |         |                        |
| NP-IPSC4         | B6129F1            | neural progenitor cell     | 2 ~ 5          | xxx                | xxx                | xxx                 | xxx                         | xxx                          | xxx                             |         |                        |
| NP-IPSC5         | B6129F1            | neural progenitor cell     | 2 ~ 5          | xxx                | xxx                | xxx                 | xxx                         | xxx                          | xxx                             |         |                        |
| NP-IPSC6         | B6129F1            | neural progenitor cell     | 2 ~ 5          | xxx                | xxx                | xxx                 | xxx                         | xxx                          | xxx                             | Yes     | Yes                    |
| NSC-NP-IPSC1     | B6129F1            | NPiPS-neural stem cell     | 2 ~ 5          | xxx                | xxx                | xxx                 | xxx                         | xxx                          | xxx                             |         |                        |
| NSC-NP-IPSC2     | B6129F1            | NPiPS-neural stem cell     | 2 ~ 5          | xxx                | xxx                | xxx                 | xxx                         | xxx                          | xxx                             |         |                        |
| NSC-NP-IPSC3     | B6129F1            | NPiPS-neural stem cell     | 2 ~ 5          | xxx                | xxx                | xxx                 | xxx                         | xxx                          | xxx                             |         |                        |
| NSC-NP-IPSC4     | B6129F1            | NPiPS-neural stem cell     | 2 ~ 5          | xxx                | xxx                | xxx                 | xxx                         | xxx                          | xxx                             |         |                        |
| NSC-NP-IPSC5     | B6129F1            | NPiPS-neural stem cell     | 2 ~ 5          | xxx                | xxx                | xxx                 | xxx                         | xxx                          | xxx                             |         |                        |
| NSC-NP-IPSC6     | B6129F1            | NPiPS-neural stem cell     | 2 ~ 5          | xxx                | xxx                | xxx                 | xxx                         | xxx                          | xxx                             |         |                        |
| NP-IPSC-TSA-AZA1 | B6129F1            | NPiPS-neural stem cell     | 2 ~ 3          | xxx                | xxx                | xxx                 | xxx                         | xxx                          | xxx                             |         |                        |
| NP-IPSC-TSA-AZA2 | B6129F1            | NPiPS-neural stem cell     | 2 ~ 3          | xxx                | xxx                | xxx                 | xxx                         | xxx                          | xxx                             |         |                        |
| NP-IPSC-TSA-AZA3 | B6129F1            | NPiPS-neural stem cell     | 2 ~ 3          | xxx                | xxx                | xxx                 | xxx                         | xxx                          | xxx                             |         |                        |
| B-NP-IPSC14-1    | B6129F1            | NPiPS-blood lineage        | 2 ~ 5          | xxx                | xxx                | xxx                 | xxx                         | xxx                          | xxx                             | Yes     | Yes                    |
| B-NP-IPSC15-1    | B6129F1            | NPiPS-blood lineage        | 2 ~ 5          | xxx                | xxx                | xxx                 | xxx                         | xxx                          | xxx                             |         |                        |
| B-NP-IPSC15-2    | B6129F1            | NPiPS-blood lineage        | 2 ~ 5          | xxx                | xxx                | xxx                 | xxx                         | xxx                          | xxx                             |         |                        |
| B-NP-IPSC1       | B6129F1            | NPiPS-blood lineage        | 2 ~ 5          | xxx                | xxx                | xxx                 | xxx                         | xxx                          | xxx                             |         |                        |
| B-NP-IPSC2       | B6129F1            | NPiPS-blood lineage        | 2 ~ 5          | xxx                | xxx                | xxx                 | xxx                         | xxx                          | xxx                             |         |                        |
| B-NP-IPSC3       | B6129F1            | NPiPS-blood lineage        | 2 ~ 5          | xxx                | xxx                | xxx                 | xxx                         | xxx                          | xxx                             |         |                        |



| Gene                             | Primer                               | Sequence (5' → 3')                                              | Chromosomal Coordinates |           |           |           |           |          |
|----------------------------------|--------------------------------------|-----------------------------------------------------------------|-------------------------|-----------|-----------|-----------|-----------|----------|
|                                  |                                      |                                                                 | Chr                     | CG1       | CG2       | CG3       | CG4       | CG5      |
| <i>Pou5f1</i><br>( <i>Oct4</i> ) | Forward                              | GTTGTTTGGTTTTGGTTTTGGATAT                                       |                         |           |           |           |           |          |
|                                  | Reverse                              | CAAAAAACCTTCATTTTCAACCTT                                        |                         |           |           |           |           |          |
|                                  | Nested forward                       | TGAGGAGTGGTTTTAGAAATAATTG                                       |                         |           |           |           |           |          |
|                                  | Nested reverse                       | /5Biosg/AATCCTCTCACCCCTACCTAAAT                                 |                         |           |           |           |           |          |
|                                  | Sequencing1 (F)<br>Sequencing2 (F)   | TGAGGAGTGGTTTTAGAAATAATTG<br>GAGGGGTAGTGTTAATAGGTTTTG           | chr17                   | 35113732  | 35113827  | 35113839  | 35113863  |          |
| <i>Nanog</i>                     | Forward                              | GTAATAGAGAAAAATTTGTTTTAAATTA                                    |                         |           |           |           |           |          |
|                                  | Reverse                              | CTACAAACATAAAAAATCAAACCT                                        |                         |           |           |           |           |          |
|                                  | Nested forward                       | TTTAAGTAGGATATAGGTTTTTTTT                                       |                         |           |           |           |           |          |
|                                  | Nested reverse                       | /5Biosg/ACTACCAAAATCTCTATTATACAC                                |                         |           |           |           |           |          |
|                                  | Sequencing 1 (F)<br>Sequencing 2 (F) | TTTAAGTAGGATATAGGTTTTTTTT<br>TTAATGTGAAGAGTAAGTAAGAAA           | chr6                    | 122672685 | 122672696 | 122672753 | 122672775 |          |
| <i>Cd37</i>                      | Forward                              | AGATGTGAGTTTTGTAGGGAGTGTATA                                     |                         |           |           |           |           |          |
|                                  | Reverse                              | CATATTCTTAATCCCTAAACCCCAT                                       |                         |           |           |           |           |          |
|                                  | Nested forward                       | TTTAGTTGGGAGAAAAAGAGTTTATTTAA                                   |                         |           |           |           |           |          |
|                                  | Nested reverse<br>Sequencing (F)     | /5Biosg/CAAACCTAACTACACACCTACACC<br>TTTTTAGTATTTGGGTTTTGTTTTA   | chr7                    | 45103657  | 45103659  | 45103673  | 45103681  |          |
| <i>Kcnrg</i>                     | Forward                              | TAATTTGTATGGAGAGTTTGGTTTG                                       |                         |           |           |           |           |          |
|                                  | Reverse                              | CCCCAATTATATTTAATTACCTTCAC                                      |                         |           |           |           |           |          |
|                                  | Nested forward                       | TTTGTAGAAGTAAAGGAGTGTGATA                                       |                         |           |           |           |           |          |
|                                  | Nested reverse<br>Sequencing (F)     | /5Biosg/TCACTACAATAACTCTATAAAAAAAA<br>TGGTAGATGTTTAGTAGGGTTTTAG | chr14                   | 60638814  | 60638820  | 60638828  | 60638848  | 60638857 |
| <i>Rest</i>                      | Forward                              | TGGGAGATAATTATTTTTAGAAAGTGA                                     |                         |           |           |           |           |          |
|                                  | Reverse                              | TCCCAAACTTTAACTATTTCTCTACA                                      |                         |           |           |           |           |          |
|                                  | Nested forward                       | TTGATTTTAAAGGTTGGAAAATAT                                        |                         |           |           |           |           |          |
|                                  | Nested reverse<br>Sequencing (F)     | /5Biosg/AAAACCTTAACTTAAACTCTACA<br>AAGTTTTAGTTGTTTAGAAATA       | chr5                    | 78343105  | 78343120  | 78343135  | 78343140  |          |
| <i>Slc32a1</i>                   | Forward                              | TTTGGTTGATTTTTAGGAATTATT                                        |                         |           |           |           |           |          |
|                                  | Reverse                              | AAAAACAACCCCAATAACC                                             |                         |           |           |           |           |          |
|                                  | Nested forward                       | TTGTGAGATTTTTATTTTTTTTT                                         |                         |           |           |           |           |          |
|                                  | Nested reverse<br>Sequencing (F)     | /5Biosg/ACCAAACCCAAAACTCAACTAAT<br>TTTTTTGATTTAATATTTAGA        | chr2                    | 158305089 | 158305106 | 158305128 |           |          |
| <i>Oct4</i>                      | Forward                              | AGCTGCTGAAGCAGAAGAGGATCATCTCATT                                 | QPCR                    |           |           |           |           |          |
|                                  | Reverse                              | GTTGTCGGCTTCCTCCA                                               | Primer                  |           |           |           |           |          |
| <i>Nanog</i>                     | Forward                              | AACCAAGGATGAAGTGCAAGCGGTCCAAG                                   | QPCR                    |           |           |           |           |          |
|                                  | Reverse                              | TTGGGTTGGTCCAAGTCT                                              | Primer                  |           |           |           |           |          |
| <i>Actin</i>                     | Forward                              | TGAAGTGTGACGTGGACATC                                            | QPCR                    |           |           |           |           |          |
|                                  | Reverse                              | GGAGGAGCAATGATCTTGA                                             | Primer                  |           |           |           |           |          |

/5Biosg/ = 5' biotin added, F = forward

**Supplementary Table 7 | Primer sequences used for bisulfite pyrosequencing and rtPCR.**  
The chromosomal coordinates for the locations of CpG sites interrogated in the bisulfite pyrosequencing are based on the UCSC Genome Browser Mouse Feb. 2006 Assembly (mm8).

| Hematopoietic Transcription Factors |         |          |         |       |        |       |        |        |         |
|-------------------------------------|---------|----------|---------|-------|--------|-------|--------|--------|---------|
| aff1                                | ankfy1  | arhgap17 | atf3    | batf  | bcl3   | bcor  | ccnk   | creb1  | creg1   |
| dazap2                              | dmtf1   | dpf2     | dr1     | elf1  | elk4   | etv3  | fli1   | gas7   | gmeb1   |
| hhex                                | htatip2 | ifi204   | ifnar2  | ikbkb | ikbkg  | ikzf1 | ikzf3  | ints12 | irf1    |
| irf2                                | irf5    | irf7     | irf8    | klf6  | limd1  | lyl1  | mtpn   | myb    | myc     |
| nfatc1                              | nfe2l2  | nfkbl    | nfkblie | nfya  | nmi    | ostf1 | papola | papolg | pcbd2   |
| plagl2                              | rab8a   | rab8b    | rbl1    | rcor1 | rel    | rela  | runx1  | runx3  | sertad1 |
| sirt7                               | smad2   | sp4      | stat1   | stat4 | stat5a | stat6 | tal1   | tceb3  | tnfaip3 |
| zfp182                              | zfp36   | zfp36l1  | zfp426  |       |        |       |        |        |         |

**Supplementary Table 8 | List of Hematopoietic Transcription Factors (Cahan and Daley, unpublished), applied in the gene enrichment analysis in Fig. 3b and Supplementary Fig. 3c.**

| Fibroblast Specific Genes |               |               |               |               |               |
|---------------------------|---------------|---------------|---------------|---------------|---------------|
| 1110012d08rik             | 1110036o03rik | 1200002n14rik | 1200009f10rik | 1300014i06rik | 1810037c20rik |
| 2310038h17rik             | 2310047d13rik | 2610034b18rik | 2810022i02rik | 2810055f11rik | 2900026a02rik |
| 3110032g18rik             | 9030425e11rik | 9130005n14rik | 9430028i06rik | 9930013i23rik | a130022j15rik |
| abca1                     | abi3bp        | aco1          | acvr1         | acvr1         | adam12        |
| adam19                    | adam33        | adam9         | adamts1       | adamts10      | adamts12      |
| adamts5                   | adamts1       | adamts15      | adcy4         | adm           | aebp1         |
| agtr1a                    | ai597468      | akap2         | aldh112       | alg14         | angpt12       |
| ankrd1                    | antxr1        | aqp1          | arfgap1       | arhgap28      | arhgef19      |
| arsj                      | asah2         | atf5          | atp11a        | avpr1a        | aw061290      |
| aw548124                  | axl           | b4galt4       | bag2          | bambi         | bc029169      |
| bc035537                  | bgn           | bicc1         | bicd2         | bmp1          | bmp5          |
| bmpcr                     | boc           | c130021i20rik | c1qtnf2       | c1qtnf3       | c1qtnf5       |
| c1qtnf6                   | c1s           | c2            | calcoco1      | calu          | capn6         |
| cask                      | casp12        | cav1          | cbr2          | ccdc102a      | ccdc68        |
| cd248                     | cd276         | cdc16         | cdc42ep1      | cdc42ep2      | cdh11         |
| cdkn1c                    | cdkn2b        | cdon          | cebpb         | cfh           | cgln1         |
| chac1                     | chmp2b        | chr11         | ckap4         | cldn1         | clec11a       |
| clec14a                   | clic4         | cnn1          | col11a1       | col14a1       | col15a1       |
| col16a1                   | col1a1        | col1a2        | col27a1       | col2a1        | col5a1        |
| col5a3                    | col6a1        | col6a2        | col7a1        | col8a1        | col8a2        |
| col9a1                    | col9a2        | colec12       | copz2         | cp            | cpa6          |
| cpne8                     | cpxm1         | cpxm2         | cpz           | crabp1        | crabp2        |
| creb3                     | creb3l2       | crim1         | crim2         | crispld2      | crlf1         |
| csf1                      | cspg4         | ctdspi        | cthr1         | ctps          | ctsl          |
| cxcl12                    | cxcl14        | cxcl5         | cyp1b1        | cyp26b1       | cyr61         |
| d10ertd610e               | d4bwg0951e    | dab2          | dcn           | ddr2          | dkk2          |
| dkk3                      | dmpk          | dpysl3        | dysf          | e130203b14rik | e430002g05rik |
| ebf1                      | ebf2          | ece1          | ednra         | efemp2        | efna4         |
| efna5                     | efnb1         | egr           | ehd2          | eln           | emid2         |
| emp2                      | emx2          | en1           | entpd2        | epha3         | ephb2         |
| ephx1                     | errfi1        | evi1          | ext1          | eya4          | fads3         |
| fap                       | farp2         | fat4          | fbln1         | fbln2         | fbln5         |
| fbn1                      | fbn2          | fbxl7         | fbxo17        | fcgrt         | fez2          |
| fgf18                     | fgf2          | fgfr2         | fgfr1         | fhl2          | figf          |
| fkbp10                    | fkbp14        | flrt2         | flt1          | fmod          | fn1           |
| fndc3b                    | fosl1         | foxc1         | foxc2         | foxd1         | frmd6         |
| frs2                      | fst           | fstl3         | fzd1          | fzd2          | fzd6          |
| fzd8                      | gadd45g       | gal3st4       | galnt14       | gas1          | gas6          |
| gata6                     | gdnf          | ggcx          | ghr           | gjb2          | glce          |
| gli3                      | glis1         | glis3         | glit1d2       | gm106         | gng11         |

Supplementary Table 9 | List of Fibroblast Specific Genes (Cahan and Daley, unpublished), applied in the gene enrichment analysis in Fig. 3b.

| Fibroblast Specific Genes |         |         |          |          |           |
|---------------------------|---------|---------|----------|----------|-----------|
| gng12                     | gng8    | golga3  | gpc1     | gpc6     | gpr124    |
| gpr176                    | gpr180  | gpx3    | gpx7     | grb10    | grem1     |
| grem2                     | gulp1   | h1f0    | has2     | hcfc1r1  | hebp2     |
| hey1                      | hgf     | hhat    | hic1     | hist1h1c | hist1h2bc |
| hist2h3c1                 | hoxa11  | hoxa2   | hoxb2    | hoxb6    | hoxc8     |
| hoxd10                    | hoxd8   | hoxd9   | hs2st1   | hspa12b  | hspa1b    |
| hsqb8                     | htra3   | id3     | igf1     | igf2     | igf2r     |
| igfbp3                    | igfbp4  | il13ra1 | il1r1    | il6st    | il7       |
| ilk                       | irx1    | irx2    | irx3     | irx5     | islr      |
| itfg3                     | itga1   | itga8   | itgb5    | kazald1  | kcne4     |
| kcnj8                     | kctd11  | kctd12b | kdelr3   | lama2    | lama4     |
| laptm4a                   | lect1   | lepre1  | lepre1   | lepre2   | lgals7    |
| lgr5                      | lhfp    | lmcd1   | lmod1    | lox      | lox1      |
| lox12                     | lox13   | lox14   | lrp1     | lrp6     | lrrc15    |
| lrrc41                    | lrrc58  | ltbp1   | ltbp2    | ltbp3    | ly6a      |
| lzts2                     | maf     | mamdc2  | marcks   | masp1    | matn2     |
| matn4                     | mcam    | meox1   | meox2    | mertk    | mfap2     |
| mfap4                     | mfap5   | mfge8   | mgst1    | mical2   | mid2      |
| mkx                       | mmp11   | mmp14   | mmp2     | morc4    | mr1       |
| mrc2                      | mrgprf  | msrb3   | msx1     | msx2     | mtmr11    |
| mxra8                     | mylk    | nab2    | nbl1     | ncbp2    | nenf      |
| net1                      | nexn    | nfatc4  | nfil3    | nfix     | nkd1      |
| nkd2                      | npnt    | npr2    | npr3     | nr2f2    | nt5e      |
| ntn4                      | nuak1   | nudt6   | nxn      | oaf      | oat       |
| olfml1                    | olfml2a | olfml2b | ormdl3   | osbp15   | osmr      |
| osr1                      | p4ha2   | p4ha3   | pappa    | pard6g   | pbxip1    |
| pcdh18                    | pcdh7   | pcdhb22 | pcyox1   | pde3a    | pdgfd     |
| pdgfra                    | pdgfrb  | pdgfrl  | pdia5    | pdpn     | pdzd11    |
| pdzrn3                    | pgf     | pgm5    | phlda3   | phldb1   | plagl1    |
| plekhf1                   | plekhh2 | pmp22   | podn     | ppic     | prelp     |
| prkcdbp                   | prkg1   | prrx2   | prss23   | prss35   | pthr1     |
| ptk7                      | ptpla   | ptpn9   | ptrf     | ptx3     | qpctl     |
| rassf8                    | rbms3   | rcn1    | rcn3     | reck     | reg       |
| rgs3                      | rhobtb3 | rhoj    | rhoq     | rin2     | rnase4    |
| rnd3                      | ror1    | ror2    | rspo3    | samd4    | scara3    |
| scara5                    | scarf2  | scube2  | scx      | scyl1    | sdc4      |
| sdpr                      | sec22b  | sema3c  | sema3d   | sepn1    | serpina3n |
| serpinf1                  | sfrp2   | sfrp4   | sgcd     | six5     | slc10a6   |
| slc16a4                   | slc2a10 | slc35f5 | slc39a13 | slco2a1  | slit3     |
| smad1                     | smad3   | smad5   | smad6    | smo      | smoc2     |

Supplementary Table 9 | List of Fibroblast Specific Genes-Continued

| Fibroblast Specific Genes |         |          |          |         |           |
|---------------------------|---------|----------|----------|---------|-----------|
| smpd2                     | smtn    | snai1    | snai2    | sned1   | sorbs3    |
| sox4                      | spg20   | sphk1    | spon2    | spsb1   | sqrdl     |
| sspn                      | st5     | stard13  | stau1    | steap1  | sulf1     |
| svep1                     | tagln   | tbc1d19  | tbx18    | tbx2    | tcf21     |
| tcf7l2                    | tenc1   | tfpi2    | tgfb1i1  | tgfb2   | tgfb3     |
| tgfbr3                    | tgm2    | thbd     | thbs1    | thbs2   | timp2     |
| tll1                      | tm9sf3  | tmbim1   | tmcc3    | tmem119 | tmem159   |
| tmem16a                   | tmem16k | tmem176a | tmem176b | tmem5   | tmem65    |
| tmem86a                   | tmem98  | tmtc4    | tnc      | tnfaip1 | tnfrsf12a |
| tnmd                      | tnn     | tnxb     | tpm1     | tspan31 | tspan6    |
| twist1                    | twist2  | ube2r2   | unc5b    | vasn    | vcam1     |
| vegfa                     | vnn1    | wipi1    | wisp1    | wnt5a   | yipf5     |
| zcchc5                    | zfand3  | zfhx4    | zfp275   | zfp449  | zfp503    |
| zfp521                    | zfp637  | zfp647   | zfp9     |         |           |

Supplementary Table 9 | List of Fibroblast Specific Genes-Continued



## Reference

1. Cahan, P., Li, H., Collins, J.J. & Daley, Q.G. Tissue-specific gene expression and autoregulatory loops. *manuscript in preparation* (2010).
2. Perez-Iratxeta, C. et al. Study of stem cell function using microarray experiments. *FEBS Lett* 579, 1795-1801 (2005).
3. Ball, M.P. et al. Targeted and genome-scale strategies reveal gene-body methylation signatures in human cells. *Nat Biotechnol* 27, 361-368 (2009).
4. Kim, Y.J. et al. The suppressive effect of myeloid Elf-1-like factor (MEF) in osteogenic differentiation. *J Cell Physiol.* 211, 253-260. (2007).
5. Kaspar, P. et al. Myb-interacting protein, ATBF1, represses transcriptional activity of Myb oncoprotein. *J Biol Chem* 274, 14422-14428 (1999).
6. Riley, P., Anson-Cartwright, L. & Cross, J.C. The Hand1 bHLH transcription factor is essential for placentation and cardiac morphogenesis. *Nat Genet* 18, 271-275 (1998).
7. Miyazaki, K. et al. Enhanced expression of p210BCR/ABL and aberrant expression of Zfp423/ZNF423 induce blast crisis of chronic myelogenous leukemia. *Blood.* 113, 4702-4710. Epub 2009 Feb 4720. (2009).
8. Kirov, G. et al. Variation in the protocadherin gamma A gene cluster. *Genomics* 82, 433-440 (2003).
9. Chiba, S. et al. Homeoprotein DLX-1 interacts with Smad4 and blocks a signaling pathway from activin A in hematopoietic cells. *Proc Natl Acad Sci U S A.* 100, 15577-15582. Epub 12003 Dec 15511. (2003).
10. Hu, Y.L., Passegue, E., Fong, S., Largman, C. & Lawrence, H.J. Evidence that the Pim1 kinase gene is a direct target of HOXA9. *Blood* 109, 4732-4738 (2007).
11. Sakano, S. et al. Characterization of a ligand for receptor protein-tyrosine kinase HTK expressed in immature hematopoietic cells. *Oncogene* 13, 813-822 (1996).
12. Iwamoto, S., Mihara, K., Downing, J.R., Pui, C.H. & Campana, D. Mesenchymal cells regulate the response of acute lymphoblastic leukemia cells to asparaginase. *J Clin Invest.* 117, 1049-1057. Epub 2007 Mar 1022. (2007).
13. Hsu, H., Xiong, J. & Goeddel, D.V. The TNF receptor 1-associated protein TRADD signals cell death and NF-kappa B activation. *Cell* 81, 495-504 (1995).

14. Kieslinger, M. et al. EBF2 regulates osteoblast-dependent differentiation of osteoclasts. *Dev Cell*. 9, 757-767. (2005).
15. Markovich, D., Regeer, R.R., Kunzelmann, K. & Dawson, P.A. Functional characterization and genomic organization of the human Na(+)-sulfate cotransporter hNaS2 gene (SLC13A4). *Biochem Biophys Res Commun* 326, 729-734 (2005).
16. Kawai, S., Yamauchi, M., Wakisaka, S., Ooshima, T. & Amano, A. Zinc-finger transcription factor odd-skipped related 2 is one of the regulators in osteoblast proliferation and bone formation. *J Bone Miner Res*. 22, 1362-1372. (2007).
17. Borland, G. et al.  $\alpha$ v $\beta$ 5 integrin sustains growth of human pre-B cells through an RGD-independent interaction with a basic domain of the CD23 protein. *J Biol Chem* 282, 27315-27326 (2007).
18. Azcoitia, V., Aracil, M., Martinez, A.C. & Torres, M. The homeodomain protein Meis1 is essential for definitive hematopoiesis and vascular patterning in the mouse embryo. *Dev Biol* 280, 307-320 (2005).
19. Knobloch, K.P. et al. Targeted inactivation of the tetraspanin CD37 impairs T-cell-dependent B-cell response under suboptimal costimulatory conditions. *Mol Cell Biol*. 20, 5363-5369. (2000).
20. van Spriël, A.B. et al. A regulatory role for CD37 in T cell proliferation. *J Immunol*. 172, 2953-2961. (2004).
21. Sasaki, T. et al. The stress kinase mitogen-activated protein kinase kinase (MKK)7 is a negative regulator of antigen receptor and growth factor receptor-induced proliferation in hematopoietic cells. *J Exp Med* 194, 757-768 (2001).
22. Yang, J. et al. Bmi-1 is a target gene for SALL4 in hematopoietic and leukemic cells. *Proc Natl Acad Sci U S A* 104, 10494-10499 (2007).
23. Kim, J., Chu, J., Shen, X., Wang, J. & Orkin, S.H. An extended transcriptional network for pluripotency of embryonic stem cells. *Cell*. 132, 1049-1061. (2008).
